# Supplementary material for: Complex population structure of the Atlantic puffin revealed by whole genome analyses
Source: PubMed Central journal article supplement (PMC8322098; doi:10.1038/s42003-021-02415-4), 2021-07-29
Supplement: 42003_2021_2415_MOESM1_ESM.pdf [file 42003_2021_2415_MOESM1_ESM.pdf]

1 **Complex population structure of the Atlantic puffin revealed by whole**  
2 **genome analyses**

3  
4 Oliver Kersten<sup>1\*</sup>, Bastiaan Star<sup>1</sup>, Deborah M. Leigh<sup>2</sup>, Tycho Anker-Nilssen<sup>3</sup>, Hallvard Strøm<sup>4</sup>,  
5 Jóhannis Danielsen<sup>5</sup>, Sébastien Descamps<sup>4</sup>, Kjell E. Erikstad<sup>6,7</sup>, Michelle G. Fitzsimmons<sup>8</sup>,  
6 Jérôme Fort<sup>9</sup>, Erpur S. Hansen<sup>10</sup>, Mike P. Harris<sup>11</sup>, Martin Irestedt<sup>12</sup>, Oddmund Kleven<sup>3</sup>, Mark L.  
7 Mallory<sup>13</sup>, Kjetill S. Jakobsen<sup>1</sup>, Sanne Boessenkool<sup>1\*</sup>  
8

9 <sup>1</sup>*Centre for Ecological and Evolutionary Synthesis (CEES), Department of Biosciences,*  
10 *University of Oslo, Blindernveien 31, 0371 Oslo, Norway*

11 <sup>2</sup>*WSL Swiss Federal Research Institute, Zürcherstrasse 111, 8903 Birmensdorf, Switzerland*

12 <sup>3</sup>*Norwegian Institute for Nature Research (NINA), Høgskoleringen 9, NO-7034 Trondheim,*  
13 *Norway*

14 <sup>4</sup>*Norwegian Polar Institute, Fram Centre, Postbox 6606, Langnes, 9296 Tromsø, Norway*

15 <sup>5</sup>*Faroe Marine Research Institute (FAMRI), Nóatún 1, FO-100 Tórshavn, Faroe Islands*

16 <sup>6</sup>*Norwegian Institute for Nature Research (NINA), Fram Centre, Postbox 6606, Langnes, 9296*  
17 *Tromsø, Norway*

18 <sup>7</sup>*Centre for Biodiversity Dynamics (CBD), Norwegian University of Science and Technology*  
19 *(NTNU), Trondheim, Norway*

20 <sup>8</sup>*Environment and Climate Change Canada, Newfoundland and Labrador, Canada*

21 <sup>9</sup>*Littoral, Environment et Sociétés (LIENSs), UMR 7266 CNRS – La Rochelle Université, 17000*  
22 *La Rochelle, France*

23 <sup>10</sup>*South Iceland Nature Research Centre, Ægisdaga 2, 900 Vestmannaeyjar, Iceland*

24 <sup>11</sup>*UK Centre for Ecology & Hydrology, Penicuik, Midlothian, EH26 0QB, UK*

25 <sup>12</sup>*Department for Bioinformatics and Genetics, Swedish Museum of Natural History, Box 50007,*  
26 *104 05 Stockholm, Sweden*

27 <sup>13</sup>*Department of Biology, Acadia University, Wolfville, Nova Scotia, Canada, B4P 2R6*  
28

29 *\*Email: oliver.kersten@ibv.uio.no, sanne.boessenkool@ibv.uio.no*  
30  
31  
32  
33  
34  
35

36 **SUPPLEMENTARY FILE**  
37  
38  
39  
40  
41  
42

|    |                                                            |           |
|----|------------------------------------------------------------|-----------|
| 43 |                                                            |           |
| 44 |                                                            |           |
| 45 | <b>1. Methods - Draft Reference Genome Assembly</b>        | <b>3</b>  |
| 46 | 1.1 DNA Extraction and Sequencing                          | 3         |
| 47 | 1.2 Initial Assembly                                       | 3         |
| 48 | 1.3 Assembly Refinement                                    | 3         |
| 49 | 1.4 Mitochondrial Genome Parsing and Annotation            | 4         |
| 50 | 1.5 Nuclear Chromosome Ordering                            | 4         |
| 51 | <b>2. Methods - Population Genomic Analyses</b>            | <b>5</b>  |
| 52 | 2.1 Sampling and DNA Extraction                            | 5         |
| 53 | 2.2 Sexing                                                 | 5         |
| 54 | 2.3 Sequencing and Data Processing                         | 6         |
| 55 | 2.4 Mitochondrial Analysis                                 | 6         |
| 56 | 2.5 Nuclear Analysis                                       | 6         |
| 57 | 2.5.1 Genotype Likelihoods                                 | 6         |
| 58 | 2.5.2 Population Structure                                 | 8         |
| 59 | 2.5.3 Phylogenetic Analyses                                | 7         |
| 60 | 2.5.4 Tajima's D and Nucleotide Diversity                  | 8         |
| 61 | 2.5.5 Heterozygosity, Runs-of-Homozygosity, and Inbreeding | 9         |
| 62 | 2.5.6 Gene flow and Isolation by Distance                  | 9         |
| 63 | 2.5.7 D- and $f_3$ -statistic                              | 11        |
| 64 | 2.5.8 Genome-wide patterns of genetic differentiation      | 11        |
| 65 | <b>3. Results - Mitochondrial Population Structure</b>     | <b>12</b> |
| 66 | <b>4. Supplementary Tables</b>                             | <b>13</b> |
| 67 | <b>5. Supplementary Figures</b>                            | <b>20</b> |
| 68 | <b>6. References</b>                                       | <b>39</b> |
| 69 |                                                            |           |

# 1. Methods - Draft Reference Genome Assembly

## 1.1 DNA Extraction and Sequencing

For the construction of a *de novo* Atlantic puffin genome assembly, a fresh blood sample was collected on 13 June 2018 from a female Atlantic puffin (ring no.: MA28445, Zool. Museum Oslo) breeding on Herynken (67°25'33"N 11°52'50"E), Røst, northern Norway, each year since 2014 (still present 2020). High molecular weight (HMW) DNA was extracted from 15 µl of blood using the Kingfisher Cell and Tissue DNA Kit following the manufacturer's protocol. This was used to prepare a single 10x Genomics Chromium technology library, which was sequenced on three Illumina HiSeqX lanes (150 bp insert size) at the SciLifeLab in Stockholm, Sweden. Each lane generated ~600-760 million paired-end reads for a total of ~ two billion reads.

## 1.2 Initial Assembly

To maximize performance and remain within the computational capacity of the assembler, two draft genomes were assembled with the Supernova assembler (v2.1.1, 10x Genomics<sup>1</sup>) after subsampling to 0.8 billion and 1 billion reads, respectively. The initial 0.8 billion Supernova assembly, hereinafter referred to as the 800M assembly, was 1.324 Gbp long and consisted of 22,635 scaffolds with a genomic scaffold N50 length of 0.758 Mbp. The initial 1 billion assembly, hereinafter referred to as the 1000M assembly, was 1.342 Gbp long and consisted of 23,650 scaffolds with a genomic scaffold N50 length of 0.711 Mbp. Subsequently, improvements to the two initial assemblies were made through several refinement steps using the reads from each HiSeqX lane separately, as well as all of their possible combinations (Supplementary Data 1a).

## 1.3 Assembly Refinement

The refinement of the assembly consisted of several downstream steps. Following recommendations of the SciLifeLab Stockholm (pers. comm.) and the BC Cancer Canada's Michael Smith Genome Sciences Centre (see <https://warrenlr.github.io/papers/DeNovoAssemblyBTL.pdf> for an overview) as performed in previous genome assemblies<sup>2-5</sup>, measures included merging of 'haplotigs', removal of contaminant sequences, misassembly correction, re-scaffolding using mapping coverage and linkage information, and gap filling (Supplementary Data 1a).

First, using 'purge\_haplotigs'<sup>6</sup>, pairs of syntenic contigs that were falsely assembled as separate contigs due to a high degree of heterozygosity were identified and one of them removed based on read depth and alignment score<sup>6</sup>. Concurrently, contigs with an exceptional high or low coverage of mapped reads (part of the 'purge\_haplotigs' output) were blasted (BLASTn) against the NCBI nr\_v5 database and "non-Eukaryote" and RNA contigs were removed. Subsequently, misassemblies in the genome were identified and corrected using Tigmint<sup>7</sup> with default parameters (Supplementary Data 1a). After inspection of the barcode multiplicities (# of reads for each barcode vs. # of different barcodes) within the sequencing data of each lane and their combinations to determine the -m parameter, scaffolding was performed with ARKS<sup>8</sup> and further improved with LINKS v1.8.6<sup>9</sup> using default settings (Supplementary Data 1a). Completeness and continuity of the assemblies were assessed with BUSCO v3<sup>10</sup> using the avian set of the OrthoDB v9 database (4,915 gene groups) and with QUAST v4.6<sup>11</sup>.

113 The most complete and continuous 800M and 1000M assembly, as well as the 3rd best  
114 assembly overall, were selected for further refinement (Supplementary Data 1b). Gaps were filled  
115 with Sealer<sup>12</sup> applying various values of -k as recommended by the developers, followed by a  
116 polishing step using ntCard/ntHits/ntEdit<sup>13</sup> using settings suggested by the authors for this type of  
117 data (Supplementary Data 1b). Resulting contigs that were flagged as “non-eukaryotic” by both  
118 Kraken2<sup>14</sup> and Blobtools<sup>15</sup>, or flagged as “non-eukaryotic” by one and as “unclassified” by the  
119 other, were removed to improve the signal to noise ratio for subsequent refinement steps.

120 The three assemblies were further refined by running a second round of the ARKS  
121 pipeline. Following the benchmarking procedure in Coombe et al.<sup>8</sup>, Tigmint-ARKS-LINKS was run  
122 for all 24 combinations of -k (30, 40, 60, 80, 100, 120) and -a (0.3, 0.5, 0.7, and 0.9), while keeping  
123 all other parameters the same as before, except for -d (1000, 2500, 5000, 7500, 10000) and -t  
124 (10, 5, 2), as recommended by the developers and applied in previous research<sup>2-5</sup>  
125 (Supplementary Data 1b). This resulted in a total of 72 draft assemblies. Assessing the  
126 assemblies using BUSCO v3 with the avian set of the OrthoDB v9 database and QUAST v4.6,  
127 the following four assemblies were kept for gap filling and polishing: The assembly with 1) the  
128 highest number of complete genes, 2) the largest maximum scaffold size, 3) the largest N50 and  
129 4) the fewest number of contigs. Applying the same settings as previously, gaps were filled again  
130 with Sealer followed by a polishing step using ntCard/ntHits/ntEdit and continuity and  
131 completeness were determined with BUSCO and QUAST (Supplementary Data 1c).

132

#### 133 **1.4 Mitochondrial Genome Parsing and Annotation**

134 To extract the mitochondrial genome/scaffold from the assembly, all scaffolds shorter than 25 kb  
135 were blasted (blastn) against a custom-built database of 135 published mitogenomes of the order  
136 ‘Charadriiformes’. The resulting significant alignment of a single 17 kb scaffold to a large number  
137 of mitogenomes in the reference database was visually inspected in Jalview v2.11.1<sup>16</sup> and the  
138 scaffold was confidently identified as the puffin mitogenome.

139 In this mitogenome, a 40+ bp poly-C region prior to a gap (poly-N) region was hard-  
140 masked to prevent erroneous mappings. The mitogenome start was shifted to match the start of  
141 most other published Charadriiformes mitogenomes and reverse complemented for the right  
142 strand orientation using SeqKit v0.12.0<sup>17</sup>.

143 Annotation was performed with the MITOS web server<sup>18</sup> with the protein prediction method  
144 of Al Arab<sup>19</sup>. The annotation was manually inspected and coordinates corrected  
145 (extended/shrunk) to match the known amino acid structures of mitochondrial genes (Table S2).  
146 The tRNA secondary structure was visualized and checked with tRNAscan-SE<sup>20</sup>. Finally, the  
147 circular genome and annotation were visualized in shinyCircos<sup>21</sup>(Figure S1).

148

#### 149 **1.5 Nuclear Chromosome Ordering**

150 Nuclear scaffolds were ordered into “pseudo-chromosomes” using the razorbill genome (*Alca*  
151 *torda* - NCBI: bAlcTor1 primary, GCA\_008658365.1), which has previously been assembled by  
152 the Vertebrate Genome Project (VGP) and is currently the only available chromosome-level  
153 assembly in the Alcidae family. All 15,328 nuclear puffin scaffolds were mapped to the razorbill  
154 genome using minimap2 v2.17<sup>22</sup>. Scaffolds were assigned to the razorbill chromosome with the  
155 largest number of respective hits/alignments, ordered along the chromosomes according to their  
156 first alignment position and concatenated into pseudo-chromosomes using 200 N's as padding

157 between each scaffold. Scaffolds that didn't align to the razorbill chromosomes were combined  
158 into an "unplaced" pseudo-chromosome using 200 N's as padding. Finally, order and placement  
159 of scaffolds was assessed by investigating synteny in coverage and length between the puffin  
160 and razorbill chromosomes (Table S1). The size of the puffin pseudo-chromosomes were of  
161 similar size as the respective razorbill chromosome counterparts (Table S1). The only exception  
162 was the Z pseudo-chromosome, which was likely a merged ZW chromosome, as the puffin was  
163 a female and the razorbill a male.

164  
165

## 166 **2. Methods - Population Genomic Analyses**

167

### 168 **2.1 Sampling and DNA Extraction**

169 Samples from a total of 72 puffins collected across 12 breeding colonies were made available for  
170 the present study by SEAPOP (<http://www.seapop.no/en>), SEATRACK  
171 (<http://www.seapop.no/en/seatrack/>) and ARCTOX (<http://www.arctox.cnrs.fr/en/home> -  
172 Canadian colonies). These samples had been collected between 2012-2018 and consisted of  
173 blood preserved in EtOH or lysis buffer, or feathers (Figure 1a, Supplementary Data 2).

174 DNA from blood samples was extracted using the DNeasy Blood & Tissue kit (Qiagen)  
175 following the manufacturer's protocol for animal blood, but doubling the amount of proteinase K  
176 for improved lysis. Blood preserved in ethanol was de-coagulated prior to the extraction by  
177 thorough vortexing and the addition of 15 µl of 0.5M EDTA to 15 µl of whole blood. DNA was  
178 eluted in 2 x 200 µl preheated EB buffer (37°C) after a 10 min incubation at room temperature.

179 For the DNA extraction from feathers, the first 0.5 cm of the feather shaft (calamus),  
180 sometimes containing visual droplets of dried blood, were clipped off and used for the extraction.  
181 Combining up to six calami per individual, DNA was extracted according to the nail/hair/feathers  
182 protocol of the DNeasy Blood & Tissue kit (Qiagen) with the following changes to improve lysis  
183 and increase DNA yield (inspired by<sup>23</sup>): the amount of proteinase K was tripled, the volume of 1M  
184 DTT was increased to 50 µl, and samples were incubated at 56°C overnight. Additionally, 70 µg  
185 of RNaseA were added to each sample prior to the addition of Buffer AL. Finally, DNA was eluted  
186 in 2 x 200 µl preheated EB buffer (37°C) after a 10 min incubation at room temperature.

187

### 188 **2.2 Sexing**

189 Individuals that had no sexing data associated with them were sexed using PCR amplification of  
190 specific allosome loci and visualization via gel electrophoresis. PCR's were done in a 50 µl  
191 reaction volume containing 1x AccuPrime Pfx Reaction Mix (Invitrogen), 1U AccuPrime Pfx DNA  
192 Polymerase (Invitrogen), 0.4 mg/ml BSA (New England Biolabs), 0.3 µM of each of the forward  
193 (P8) and reverse (M5) primer published by Griffiths et al.<sup>24</sup> and Bantock et al.<sup>25</sup>, and 5µl of  
194 template. The thermal profile included an initiation step at 95°C for 5 min, followed by 35 (blood  
195 extracts) to 40 (feather extracts) cycles of 30 s at 95°C, 30 s at 50°C and 30 s at 68°C, and a final  
196 extension step of 68°C for 5 min. Gel products were visualized on a 3 % agarose gel and females  
197 were identified as having two bands (ZW), while males only showed one band (ZZ).

198

### 199 **2.3 Sequencing and Data Processing**

200 Genomic libraries were built by the Norwegian Sequencing Centre using a TruSeq DNA Nano  
201 preparation kit (Illumina) applying DNA shearing to an approximate insert size of 350 bp, and  
202 subsequently sequenced on an Illumina HiSeq4000. Each library was either pooled with 31 other  
203 samples and sequenced across four lanes, or pooled with 15 other samples and sequenced  
204 across two lanes (Canadian samples).

205 Sequencing reads were processed in PALEOMIX v1.2.14<sup>26</sup>. Specifically, after removing  
206 adapters from forward and reverse reads with AdapterRemoval v2.3.1<sup>27</sup> (`--mm3 --minlength25 --`  
207 `collapse yes --trimns yes --trimqualities yes`), reads were mapped to the Atlantic puffin draft  
208 assembly using BWA *mem* v0.7.17<sup>28</sup>. Reads that aligned with a quality score (MapQ) of  $\geq 25$  were  
209 kept for duplicate removal with PicardTools v2.18.27<sup>29</sup> and indel realignment using GATKs  
210 *IndelRealigner*<sup>30</sup>. Finally, bam files were split into nuclear and mitochondrial bam files using  
211 SAMtools v1.9<sup>31</sup>.

212

## 213 **2.4 Mitochondrial Analysis**

214 Genotypes were jointly called with GATK v4.1.4<sup>30</sup> by using the *HaplotypeCaller* (`--ploidy 1 --ERC`  
215 `GVCF`), *CombineGVCFs* and *GenotypeGVCFs* tool. Genotypes were filtered with BCFtools v1.9<sup>31</sup>  
216 by applying "`--SnpGap 10 -e 'QD < 2.0 || MQ < 40 || FS > 60.0 || SOR > 3 || MQRankSum < -12.5`  
217 `|| ReadPosRankSum < -8.0'`" according to GATKs Best Practices<sup>32</sup> and genotypes with a read  
218 depth less than 3 or a quality less than 15 were set as missing. Indels and non-biallelic SNPs  
219 were removed and only SNPs present in all individuals were kept for subsequent analyses.

220 The final SNP dataset was annotated with snpEff<sup>33</sup> utilizing the annotation of the newly  
221 assembled mitogenome of the Atlantic puffin (see above) and converted into a mitogenome  
222 sequence alignment with BCFtools v1.9 (`consensus -H 1 -M N`). To serve as an outgroup, four  
223 other species of the family Alcidae, i.e. the Razorbill (*Alca torda*, NCBI: CM018102.1), the Crested  
224 Auklet (*Aethia cristatella*, NCBI: NC\_045517.1), the Ancient Murrelet (*Synthliboramphus*  
225 *antiquus*, NCBI: NC\_007978.1) and the Japanese Murrelet (*Synthliboramphus wumizusume*,  
226 NCBI: NC\_029328.1), were appended to the alignment using Muscle v3.8.31<sup>34</sup> (`-profile + -refine`)  
227 and BCFtools v1.9 (`merge --missing-to-ref`).

228 To construct a maximum-likelihood phylogenetic tree, the alignment was split into seven  
229 partitions, i.e. one partition for a concatenated alignment of each of the three codon positions of  
230 the protein coding genes, one partition for the concatenated alignment of the rRNA regions, one  
231 partition for the concatenated alignment of the tRNAs, one partition for the alignment of the control  
232 region, and one partition for the concatenated alignment of the "intergenic" regions. The best-  
233 fitting evolutionary model for each partition was found by *ModelFinder*<sup>35</sup> followed by a greedy  
234 strategy<sup>36</sup> that starts with the full partition model and subsequently merges two partitions until the  
235 model fit does not increase any further, thereby preventing overparameterization. All partitions  
236 were set to share the same set of branch lengths, but were allowed to have their own evolutionary  
237 rate<sup>37</sup>. The tree was built with IQTree v1.6.12 using 1000 ultrafast bootstrap replicates by  
238 resampling partitions and then sites within resampled partitions<sup>38</sup>, and each bootstrap tree was  
239 optimized using a hill-climbing nearest neighbor interchange (NNI) search based directly on the  
240 corresponding bootstrap alignment. The resulting tree was used to draw a haplotype genealogy  
241 graph with Fitchi<sup>39</sup>.

242 Using Arlequin v.3.5<sup>40</sup>, haplotype (h), nucleotide diversity ( $\pi$ ) and Tajima's  $D$ <sup>41</sup> were  
243 calculated for each colony, for each genomic cluster defined by the nuclear analysis, and globally.  
244 Additionally, an Ewens–Watterson test<sup>42</sup>, Chakraborty's test of population amalgamation<sup>43</sup> and  
245 Fu's  $F_s$  test<sup>44</sup> were conducted for each of those groups. To further identify population  
246 differentiation, the proportion of sequence variation ( $\Phi_{ST}$ ) was estimated for all pairs of populations  
247 and genomic clusters. Hierarchical AMOVA tests subsequently determined the significance of a  
248 *priori* subdivisions into colonies and genomic clusters. Calculation of  $\Phi_{ST}$  and AMOVA tests were  
249 conducted in Arlequin applying 10,100 permutations and a Holm correction for multiple tests (for  
250  $\Phi_{ST}$ ).

251

## 252 **2.5 Nuclear Analysis**

### 253 **2.5.1 Genotype Likelihoods**

254 The majority of population genomic analyses were based on genotype likelihoods as implemented  
255 in ANGSD v.0.931<sup>45</sup>. Prior to calculating genotype likelihoods, the quality of the mapped  
256 sequencing data was assessed in an ANGSD pre-run using “-uniqueOnly 1 -remove\_bads 1 -  
257 minMapQ 25 -maxDepth 800 -checkBamHeaders 1 -C 50 -baq 2 -doQsDist 1 -doDepth 1 -  
258 doCounts 1 -dumpCounts 2 -GL 1”. For each individual, the depth of coverage per individual (0-  
259 20X) versus the proportion of sites was determined and visualized in R v.3.6<sup>46</sup> with a cannibalized  
260 script ([https://github.com/z0on/2bRAD\\_denovo/blob/master/plotQC.R](https://github.com/z0on/2bRAD_denovo/blob/master/plotQC.R)). As a result, an individual  
261 from the Isle of May (IOM001) was removed from the dataset due to low endogenous DNA  
262 content, low average depth of coverage and a large proportion of missing sites compared to all  
263 other samples (Supplementary Data 2, Figure S2a). Subsequently, the ANGSD pre-run was  
264 repeated with the same parameters, but without the removed individual. “Global Depth vs. No. of  
265 sites” and “Genotyping Rate Cutoff vs. No. of remaining sites” were calculated and plotted in R  
266 with the above-mentioned script to determine the appropriate cutoffs for depth and genotyping  
267 rate (Figure S2b).

268 Genotype likelihoods for SNPs covered in all individuals were calculated and filtered in  
269 ANGSD with “-uniqueOnly 1 -remove\_bads 1 -minMapQ 30 -minQ 30 -C 50 -baq 2 -  
270 checkBamHeaders 1 -HWE\_pval 1e-2 -sb\_pval 1e-5 -hetbias\_pval 1e-5 -skipTriallelic 1 -minInd  
271 71 -snp\_pval 1e-6 -minMaf 0.05 -setMaxDepth 635 -setMinDepth 365 -doMajorMinor 1 -doMaf 1  
272 -doCounts 1 -doGlf 2 -doHWE 1 -dosnpstat 1”, resulting in the genotype likelihoods of 7,521,565  
273 sites stored in *beagle* format.

274 The dataset was further pruned to account for linkage disequilibrium. Linkage expressed  
275 as the  $r^2$  value was calculated for pairs of sites within 50 kb windows along all pseudo-  
276 chromosomes using ngsLD<sup>47</sup>. Linked sites ( $R^2 > 0.2$ ) were clustered into larger groups using *mcl*<sup>48</sup>  
277 in the software OrthoMCL v2.0.92<sup>49</sup>, and the most central site was selected as representative of  
278 each block for subsequent analyses<sup>50</sup>. Additionally, all variants located on the Z-pseudo-  
279 chromosome and “unplaced scaffolds” were excluded from the analyses yielding a final genotype  
280 likelihood panel consisting of 1,093,765 sites.

281

### 282 2.5.2 Population Structure

283 Genomic population structure was investigated using a Principal Component Analysis (PCA) of  
284 the genotype likelihood panel. PCAngsd v0.982<sup>51</sup> was run using default settings, followed by  
285 plotting the eigenvectors and eigenvalues of the two principal components explaining most  
286 observed genetic variation. Additional PCAs were computed for selected genomic sub-clusters  
287 containing subsets of the data following the same method.

288 Individual ancestry proportions were estimated using a maximum likelihood (ML) approach  
289 implemented in ngsAdmix v32<sup>52</sup> by setting the number of ancestral populations, K, from 1 to 10  
290 and conducting 50 replicate runs for each K. The runs were clustered after similarity for each K  
291 and ancestry proportions were averaged within the major cluster using Clumpak<sup>53</sup> with default  
292 settings. The optimal value of K was chosen based on the method of Evanno<sup>54</sup> and biological  
293 validity. An additional “hierarchical” admixture analysis was conducted for a genomic sub-cluster  
294 using identical methods.

295

### 296 2.5.3 Phylogenetic Analyses

297 In order to be able to add an outgroup to the phylogenetic trees in this study, unpublished, raw  
298 10xGenomics sequencing data used for the assembly of the embargoed razorbill genome (*Alca*  
299 *torda*, GCA\_008658365.1) were mapped to the Atlantic puffin genome with PALEOMIX (settings  
300 as in *Sequencing and Data Processing*), followed by calculating genotype likelihoods for the  
301 1,093,765 sites of the final puffin dataset in ANGSD (settings as in *Genotype likelihoods*) after  
302 combining the razorbill and puffin data. Using this panel of genotype likelihoods, 100 bootstrap  
303 replicates of pairwise genetic distance matrices (p-distance) were calculated with ngsDist v1.0.8  
304 by randomly sampling with replacement blocks of 20 SNPs. For each distance matrix replicate  
305 and the original distance matrix, a neighbor-joining (NJ) tree was built with FastMe v2.1.5<sup>55</sup>, using  
306 the optimized BalME criterion followed by improving the initial tree topology with nearest-neighbor  
307 interchange (NNI) and subtree pruning and regrafting (SPR). The resulting trees were combined  
308 with IQTree v1.6.12<sup>56</sup>.

309 Assessing and authenticating the topology of the NJ tree, a sample-based ML  
310 phylogenetic tree was built with Treemix v1.13<sup>57</sup>. At each of the 1,093,765 sites of the final puffin  
311 dataset, the consensus base was determined for each sample (including the razorbill as outgroup)  
312 with ANGSD (*-doIBS 2 -doMajorMinor 1 -output 0 0*) and converted into an allele count/frequency.  
313 Missing sites in the razorbill were randomly assigned a “1,0” or “0,1”. Treemix was run 100 times  
314 at different seeds while applying a round of global rearrangements (*-global*), setting the razorbill  
315 at the root (*-root RAZ*), and turning off sample size correction (*-noss*). The topology of the replicate  
316 with the highest likelihood was assessed by generating 100 bootstrap replicates (*-bootstrap*) via  
317 resampling the data in blocks of 500 SNPs (*-k 500*). Bootstrap values were projected onto the  
318 “main” tree using IQTree.

319 Additionally, to infer patterns of population splitting and mixing, population-based ML trees  
320 including up to ten migration edges were generated in Treemix. The sample-wise allele frequency  
321 data matrix was converted into a population-wise data matrix by summing the allele counts of all  
322 samples of a population at each site. For each migration (0-10), 100 replicates were generated in  
323 Treemix applying the same settings as for the sample-based ML trees, except for using the *-m* (#  
324 of migration edges) flag and keeping the sample size correction turned on. The optimal number  
325 of migrations was picked using a quantitative approach implemented in the R package *OptM*  
326 (<https://CRAN.R-project.org/package=OptM>) by evaluating the distribution of explained variance,  
327 log likelihoods, and covariance with an increase in migration edges, and by applying the method  
328 of Evanno<sup>54</sup> and several different linear threshold models. For  $m_0$  and  $m_{BEST}$ , the tree with the  
329 highest likelihood was selected and its topology was evaluated by generating 100 bootstrap  
330 replicates through resampling the data in blocks of 500 SNPs. Bootstrap values were projected  
331 onto each “main” tree using IQTree.

332

#### 333 2.5.4 Tajima’s D and Nucleotide Diversity

334 A set of neutrality tests and population statistics were calculated using colony-based one-  
335 dimensional (1D) folded Site-Frequency-Spectra (SFS). A set of sites covered in all individuals  
336 and passing several quality filters without removing rare alleles was selected in ANGSD with “-  
337 *uniqueOnly 1 -remove\_bads 1 -minMapQ 30 -minQ 30 -dosnpstat 1 -C 50 -baq 2 -*  
338 *checkBamHeaders 1 -doHWE 1 -sb\_pval 1e-5 -hetbias\_pval 1e-5 -skipTriallelic 1 -minInd 71 -*  
339 *setMaxDepth 635 -setminDepth 365 -doMajorMinor 1 -doMaf 1 -doCounts 1*”. The resulting  
340 dataset was further pruned by filtering out sites where heterozygote counts comprise more than



341 50% of all counts, as those could represent lumped paralogs<sup>58</sup> (also see  
342 <https://github.com/ANGSD/angsd/issues/156>), generating in a final count of 829,850,258 sites.  
343 Site allele frequency (SAF) likelihoods (.saf.idx file) were estimated for each population, genomic  
344 cluster, and globally in ANGSD (*angsd -sites sites\_2do -GL 1 -doSaf 1*) with the puffin draft  
345 genome as ancestral sequence, followed by calculating folded 1D-SFS with *realSFS*. For each  
346 population, genomic cluster, and globally, Tajima's D, and nucleotide diversity ( $\pi$ ) were computed  
347 per pseudo-chromosome (*thetaStat do\_stat* command in ANGSD) utilizing the per-site  $\theta$   
348 estimates, which were determined by the *realSFS saf2theta* command using the folded 1D-SFS  
349 and SAF likelihoods. Nucleotide diversity per pseudo-chromosome was calculated by dividing the  
350  $\theta_{\text{pairwise}}$  estimate by the number of sites. Significance of differences in nucleotide diversity between  
351 colonies and against the global mean was assessed with Wilcoxon Rank Sum test<sup>59</sup> applying the  
352 Holm correction<sup>60</sup>.

353

### 354 2.5.5 Heterozygosity, Runs-of-Homozygosity, and Inbreeding

355 Individual genome-wide heterozygosity was calculated in ANGSD. Specifically, using the puffin  
356 draft genome as ancestral reference, the individual, folded, 1D SFS of 829,850,258 sites (see  
357 *Tajima's D and Nucleotide Diversity*) was estimated with ANGSD (-doSaf) and *realSFS*.  
358 Heterozygosity was calculated by dividing the number of polymorphic sites by the number of total  
359 sites present in the SFS. Statistical significance of differences in heterozygosity between  
360 populations was assessed with a global Kruskal-Wallis test<sup>61</sup>, followed by a *post-hoc* Dunn test<sup>62</sup>  
361 applying the Holm correction<sup>60</sup>.

362 The proportion of runs of homozygosity (RoH) within each puffin genome was computed  
363 by calculating local estimates of heterozygosity in sliding windows following the approach in  
364 Sánchez-Barreiro et al. (2020)<sup>63</sup>. A list containing 23,002 100 kbp sliding windows with a 50 kbp  
365 shift along the 25 pseudo-chromosomes (*-r parameter*) and the concatenated (all pseudo-  
366 chromosomes) site allele frequency likelihoods (.saf.idx files) from above were used for the  
367 estimation of the window-based SFS in *realSFS*. Local heterozygosity was calculated as above  
368 and the distribution of local heterozygosity per sample was visualized (Figure S18). The 10%  
369 quantile of the average local heterozygosity across all samples was defined as the cutoff for a  
370 "low heterozygosity region" and was set to  $1.435663 \times 10^{-3}$  (Figure S18). RoH were declared as  
371 all regions with at least two subsequent windows of low heterozygosity (below cutoff) and their  
372 final length was calculated as described in Sánchez-Barreiro et al. (2020)<sup>63</sup>, i.e.  $RoH_{\text{length}} = n_{\text{windows}}$   
373  $\times 100 \text{ kbp} - ((n_{\text{windows}} - 1) \times 50 \text{ kbp})$ . As a result, the minimum RoH length was 150 kbp, increasing  
374 in steps of 50 kbp. An individual inbreeding coefficient based on the RoH,  $F_{\text{RoH}}$ , was subsequently  
375 calculated as in Sánchez-Barreiro et al. (2020)<sup>63</sup> by computing the fraction of the entire genome  
376 falling into RoHs, with the entire genome being the total length of windows scanned, i.e.  $Total$   
377  $Length = n_{\text{All\_windows}} \times 100 \text{ kbp} - ((n_{\text{All\_windows}} - 1) \times 50 \text{ kbp})$ . Statistical significance of differences in  
378  $F_{\text{RoH}}$  between populations was assessed with a global Kruskal-Wallis test<sup>61</sup>, followed by a *post-*  
379 *hoc* Dunn test<sup>62</sup> applying the Holm correction<sup>60</sup>.

380

### 381 2.5.6 Gene flow and Isolation by Distance

382 Assessing potential landscape genetic patterns of Isolation-By-Distance (IBD) within the breeding  
383 range of the Atlantic puffin, the program EEMS<sup>64</sup> (estimated effective migration surfaces) was  
384 used to model the association between genetic and geographic data by visualizing the existing

385 population structure and highlighting regions of higher-than-average and lower-than-average  
386 historic gene flow. As input, a pairwise genetic distance matrix was calculated in ANGSD by  
387 sampling the consensus base (*-doIBS 2 -makeMatrix 1*) at the 1,093,765 filtered sites included in  
388 the genotype likelihood set (see *Population Structure*) for each sample. The matrix was fed into  
389 10 independent runs of EEMS, each consisting of one MCMC chain of six million iterations with  
390 a two million iteration burn-in, 9999 thinning iterations, and 1000 underlying demes. The  
391 geographic population grid was outlined by a polygon drawn with  
392 <http://www.birdtheme.org/useful/v3tool.html>. As suggested by Petkova et al.<sup>64</sup>, proposal  
393 variances thresholds were increased as follows to lower the proposal acceptance rate to a  
394 recommended level (10 - 40%): *mSeedsProposalS2 = 0.14*, *qSeedsProposalS2 = 0.6*,  
395 *mEffctProposalS2 = 0.9*, *qEffctProposalS2 = 0.006*. The EEMS output was visualized in R with  
396 code supplied by EEMS. One of the runs converged at a local as opposed to the global likelihood  
397 maximum and was excluded from the analysis (Figure S13b).

398 Supplementing the results of the EEMS analysis, a traditional IBD analysis was conducted  
399 by determining geographical and genetic distances between the 12 colonies and assessing the  
400 significance of the correlation between the two distance matrices with a Mantel test<sup>65</sup> and a  
401 Multiple Regression on distance Matrix (MRM)<sup>66</sup> analysis. In order to calculate  $F_{ST}$  as a proxy for  
402 genetic distance, two-dimensional (2D), folded SFS were computed for each population pair in  
403 *realSFS* by applying the per-population SAF likelihoods (*.saf.idx* files) generated above (see  
404 *Tajima's D and Nucleotide Diversity*). Subsequently, 2D SFS of population pairs were used  
405 together with the per-population SAF likelihoods to calculate the pairwise  $F_{ST}$  between each  
406 colony (*realSFS fst -whichFst 1 -fstout*). Pairwise  $F_{ST}$  values were converted to Slatkin's linearized  
407  $F_{ST}$ <sup>67</sup>. Least Cost Path distances (paths between colonies only over water) between colony  
408 coordinates (latitude/longitude) were calculated using the R package *marmap*<sup>68</sup> and used as  
409 geographic distances. The Mantel test (999 permutations) and MRM analysis were performed  
410 with the R package *ecodist*<sup>69</sup>. A two-dimensional kernel density estimation (kde2d) with 300 grid  
411 points in each direction was run with the R package *MASS*<sup>70</sup> to visualize substructure in the  
412 landscape genetic patterns. All analyses for IBD were re-run on subsets of colonies by  
413 progressively removing the colony from the geographic and genetic distance matrices, whose  
414 removal led to the highest proportion of variance in genetic distance explained by geographic  
415 distance in the resulting regression model (Spitsbergen, Isle of May, Bjørnøya and Gannet Isl.).  
416 Hornøya was not removed due to comparably low Slatkin's linearized  $F_{ST}$  values at relatively large  
417 geographic distances.

418 A distance-based Redundancy Analysis (dbRDA)<sup>71</sup> was conducted to corroborate  
419 the results of the MRM analyses and Mantel tests and to estimate the relative contribution of IBD  
420 and Isolation-By-Environment (IBE) to the observed Atlantic puffin population structure. The  
421 dbRDA was run between the genetic distance matrix containing pairwise Slatkin's linearized  $F_{ST}$   
422 (dependent variables) versus geographic and environmental parameters (explanatory  
423 variables)<sup>71</sup>. A principal coordinate analysis (PCoA) was performed using the inter-colony pairwise  
424 Slatkin's linearized  $F_{ST}$  values, and the resulting principal component axes were kept as response  
425 variable after applying the Cailliez<sup>72</sup> correction to only retain positive eigenvalues<sup>73</sup>. To obtain  
426 uncorrelated geographic variables, the Least Cost Path distance matrix was transformed to  
427 positive Moran's Eigenvector Maps (MEMs)<sup>74</sup>, using the R package *adespatial*<sup>75</sup> by setting the  
428 truncation threshold to the length of the longest edge of the minimum spanning tree. The sea-

429 surface-temperature (SST) at each colony during the months of April-August (breeding season)  
430 in the last 50 years<sup>76</sup> was retrieved from the HadiSST database<sup>77</sup> and the mean SST was used  
431 as environmental variable for each colony. Multicollinearity among geographic and environmental  
432 variables was accounted for by only retaining variables with a variance inflation factor < 5. A global  
433 dbRDA was run with all MEMs and the environmental variable and proportion of explained  
434 variance (adjusted  $R^2$ ) as well as model probability were calculated using ANOVA tests with 999  
435 permutations. For statistically significant global dbRDA models, the most significant variables  
436 (geographic or environmental) were selected via a stepwise regression using both forward and  
437 backward selection, and a stopping criterion<sup>78</sup>. The chosen variables then served as input for a  
438 reduced dbRDA, for which the marginal effect of each variable and its significance were tested  
439 using ANOVA tests with 999 permutations. A partial dbRDA with variance partitioning was  
440 conducted to estimate the independent contribution of the geographic and environmental  
441 variables in the optimized model and their significance, which also served as an estimation of the  
442 separate effects of IBD and IBE. Similar to the MRM analyses and Mantel tests, these analyses  
443 were repeated on subsets of colonies by progressively removing the colony from the geographic,  
444 environmental and genetic distance matrices, whose removal led to the highest proportion of  
445 variance explained in the resulting global dbRDA model. Optimized dbRDA model analyses were  
446 only conducted in cases where the selected spatial variables included both a geographic and  
447 environmental variable in order to be able to parse out effects of IBD and IBE. Methods and R  
448 code for the dbRDA were found at <https://github.com/laurabenestan/db-RDA-and-db-MEM><sup>79</sup>.

449

#### 450 2.5.7 *D- and $f_3$ -statistic*

451 Additional assessments of admixture and gene flow were conducted by calculating  $f_3$ -statistics  
452 and multi-population D-statistics (aka ABBA BABA test)<sup>80</sup>. Using the panel of population allele  
453 frequencies (see *Phylogenetic Analyses*),  $f_3$ -statistics were calculated in Treemix for each unique  
454 combination of ((A,B),C)) of the 12 puffin populations, where significantly negative values of the  
455  $f_3$  statistic (Z-score < -3) are evidence of admixture between population A and B in population  
456 C.

457 The D-statistics was calculated in ANGSD (-doAbbababa2) for each combination of  
458 ((A,B),C),Outgroup) using the 12 puffin populations. The statistic has a positive value if, in  
459 ((A,B),C),Outgroup), there is an excess of shared sites between A and Outgroup or B and C, and  
460 a negative value if there is an excess of shared sites between A and C or B and Outgroup, with  
461 statistical significance at  $-3 > Z\text{-score} > 3$ . The outgroup was generated in ANGSD by applying -  
462 doFasta 2 (with -doCounts 1 -C 50 -minMapQ 30 -minQ 30 and min and max depth set to half  
463 and double the average depth) to the 10xGenomics sequencing data of the Razorbill mapped to  
464 the puffin reference genome (see *Phylogenetic Analyses*). The outgroup multi-*fasta* file was  
465 further filtered by removing the sequences corresponding to the mitochondrial region, the Z-  
466 chromosome, and “unplaced” scaffolds in the puffin reference genome.

467

#### 468 2.5.8 *Genome-wide patterns of genetic differentiation*

469 To assess whether genetic differentiation is genome-wide or localized, patterns of pairwise  $F_{ST}$   
470 values between genomic clusters were investigated. Two-dimensional (2D), folded SFS were  
471 computed for three genomic cluster/population pairs (Spitsbergen, Isle of May, Canada vs.  
472 Norway/Iceland/Faroe) in *realSFS* by applying the genomic cluster/population SAF likelihoods

473 (.saf.idx files) generated above (see *Tajima's D and Nucleotide Diversity*). Subsequently, 2D SFS  
474 of these pairs were used together with the SAF likelihoods to calculate the pairwise  $F_{ST}$  between  
475 each pair in sliding windows of 50 kb with 12.5 kb steps across the 25 pseudo-chromosomes  
476 (*realSFS fst -whichFst 1 -fstout* followed by *realSFS fst stats2 -win 50000 -step 12500*). The  
477 window size of 50 kb was chosen for sliding window analyses because LD decays to ca. 10% ( $R$   
478  $< 0.025$ ) within this distance (Figure S19). In addition, the median pairwise  $F_{ST}$  was calculated  
479 using the resulting 93,778 sliding windows.

480

### 481 **3. Results - Mitochondrial Population Structure**

482

483 We obtained 192 mitogenomic SNPs of which 160 (83.33 %) were located in protein coding  
484 genes, five (2.60 %) in rRNAs, 19 (9.90 %) in tRNAs and six (3.13 %) in the Control Region (Table  
485 S8). The polymorphic sites across the mitogenomes defined 66 distinct haplotypes (Table S3), of  
486 which only four occurred in more than one individual (Figure 1b, Figure S3). Indicating high  
487 homoplasy, haplotype diversity was high ( $0.998 \pm 0.003$ ) and nucleotide diversity was low overall  
488 ( $\pi = 0.0008 \pm 0.0004$ ), with both being similar across colonies and nuclear genomic clusters  
489 (Table S3). We observed no significant geographic structure in mitogenome data (Figure 1b,  
490 Figures S3, S4). Similarly, while neither the global estimate of  $\Phi_{ST}$  (0.006) nor pairwise  $\Phi_{ST}$  values  
491 involving all colonies or genomic clusters were significant ( $P > 0.05$ ,  $n_{Colonies} = 12$ ,  $n_{Clusters} = 4$ ), the  
492 majority of  $\Phi_{ST}$  values including Spitsbergen were substantially higher compared to the rest (Table  
493 S4). Nevertheless, a set of neutrality tests and the haplotype network indicated inter-colony  
494 differences, as well as general recent population expansion (Table S3). While the Ewens-  
495 Watterson's tests were not significant for any of the colonies or genomic clusters, significant  
496 Tajima's  $D$ , significant Fu's  $F_s$ , or Chakraborty's tests for the "global" population, the cluster  
497 comprising mainland Norwegian, Icelandic and Faroese colonies, and the Canadian group  
498 indicated an excess number of alleles and absence of mutation-drift equilibrium, as would be  
499 expected from a recent population expansion (Table S3). Concordant with the global population  
500 expansion, the Fitchi haplotype network (Figure 1b, Figure S3) was presented in a distinctive star-  
501 shape, often associated with a population expansion, e.g. from a single refugium during the Last  
502 Glacial Maximum (LGM).

503  
504  
505  
506  
507  
508

#### 4. Supplementary Tables

**Table S1: Length and number of placed scaffolds for each (pseudo-)chromosome of the Atlantic Puffin draft assembly.** Scaffolds were mapped to the razorbill reference genome using minimap2 to order them into pseudo-chromosomes.

| Puffin (Pseudo)chromosome               | No. of Scaffolds | Total Length of Scaffolds without 'N' padding (bp) | Length of Razorbill Chromosomes (bp) | Difference (%) |
|-----------------------------------------|------------------|----------------------------------------------------|--------------------------------------|----------------|
| Chromosome 01                           | 1,876            | 234,966,019                                        | 215,872,496                          | 8.84           |
| Chromosome 02                           | 1,379            | 176,321,017                                        | 165,051,286                          | 6.83           |
| Chromosome 03                           | 1,017            | 133,497,470                                        | 125,510,139                          | 6.36           |
| Chromosome 04                           | 567              | 88,537,706                                         | 82,438,829                           | 7.40           |
| Chromosome 05                           | 725              | 76,161,884                                         | 70,992,871                           | 7.28           |
| Chromosome 06                           | 541              | 55,750,312                                         | 52,539,765                           | 6.11           |
| Chromosome 07                           | 513              | 52,461,240                                         | 47,750,090                           | 9.87           |
| Chromosome 08                           | 537              | 47,829,909                                         | 43,861,690                           | 9.05           |
| Chromosome 09                           | 377              | 47,463,729                                         | 43,770,548                           | 8.44           |
| Chromosome 10                           | 374              | 45,442,885                                         | 41,489,931                           | 9.53           |
| Chromosome 11                           | 551              | 42,383,409                                         | 38,974,675                           | 8.75           |
| Chromosome 12                           | 339              | 38,810,983                                         | 35,546,317                           | 9.18           |
| Chromosome 13                           | 511              | 38,802,013                                         | 34,322,904                           | 13.05          |
| Chromosome 14                           | 179              | 14,714,561                                         | 13,223,547                           | 11.28          |
| Chromosome 15                           | 205              | 14,765,580                                         | 13,149,485                           | 12.29          |
| Chromosome 16                           | 268              | 10,588,656                                         | 9,767,604                            | 8.41           |
| Chromosome 17                           | 284              | 9,490,077                                          | 8,686,195                            | 9.25           |
| Chromosome 18                           | 184              | 8,770,925                                          | 8,379,326                            | 4.67           |
| Chromosome 19                           | 454              | 7,553,894                                          | 8,133,896                            | -7.13          |
| Chromosome 20                           | 214              | 8,626,142                                          | 7,777,642                            | 10.91          |
| Chromosome 21                           | 381              | 6,450,336                                          | 7,118,070                            | -9.38          |
| Chromosome 22                           | 279              | 6,110,852                                          | 6,270,964                            | -2.55          |
| Chromosome 23                           | 315              | 2,728,230                                          | 3,233,901                            | -15.64         |
| Chromosome 24                           | 238              | 2,117,903                                          | 2,563,298                            | -17.38         |
| Chromosome 25                           | 99               | 852,274                                            | 926,252                              | -7.99          |
| Chromosome Z                            | 921              | 105,477,361                                        | 84,526,827                           | 24.79          |
| Unplaced                                | 2,000            | 17,061,156                                         | N/A                                  | N/A            |
| Total Length of the Razorbill Genome    | 1,171,878,548    | bp                                                 |                                      |                |
| Total Length of All Placed Scaffolds    | 1,276,675,367    | bp                                                 |                                      |                |
| Total Length of All Scaffolds           | 1,293,736,523    | bp                                                 |                                      |                |
| Total Number of Placed Scaffolds        | 13,328           |                                                    |                                      |                |
| Total Number of Scaffolds               | 15,328           |                                                    |                                      |                |
| Median Length of Unplaced Scaffolds     | 1,839            | bp                                                 |                                      |                |
| Number of N's in Unplaced Scaffolds     | 9,166,580        |                                                    |                                      |                |
| Number of non-N's in Unplaced Scaffolds | 7,894,576        |                                                    |                                      |                |

509  
510  
511  
512

513 **Table S2: Manual annotation changes to the mitogenome of the Atlantic Puffin.** Changes were made after manual inspection of the MITOS web server  
 514 annotation. Reasons for changes and noteworthy attributes of several protein coding genes are mentioned. Start and stop coordinates are in BED format.

| Original ID                                                                                                                                                                                                                                         | Original Coordinates (bp) |        | Corrected ID | Corrected Coordinates (bp) |        | Notes                                                                                                                                                                           |
|-----------------------------------------------------------------------------------------------------------------------------------------------------------------------------------------------------------------------------------------------------|---------------------------|--------|--------------|----------------------------|--------|---------------------------------------------------------------------------------------------------------------------------------------------------------------------------------|
|                                                                                                                                                                                                                                                     | Start                     | Stop   |              | Start                      | Stop   |                                                                                                                                                                                 |
| <b>NAD1</b>                                                                                                                                                                                                                                         | 2,792                     | 3,763  | <b>NAD1</b>  | 2,792                      | 3,770  | End extended by 7 bp.                                                                                                                                                           |
| <b>NAD3_a</b>                                                                                                                                                                                                                                       | 9,540                     | 9,702  | <b>NAD3</b>  | 9,525                      | 9,874  | Originally split because of a frameshift mutation. This mutation is well known and presumably skipped during translation (Mindell et al. 1998). Start was extended by 5AA/15bp. |
| <b>NAD3_b</b>                                                                                                                                                                                                                                       | 9,700                     | 9,874  |              |                            |        |                                                                                                                                                                                 |
| <b>NAD4</b>                                                                                                                                                                                                                                         | 10,239                    | 11,617 | <b>NAD4</b>  | 10,239                     | 11,622 | End extended by 5 bp.                                                                                                                                                           |
| <b>NAD5</b>                                                                                                                                                                                                                                         | 11,801                    | 13,637 | -            | -                          | -      | Start codon is GTG instead of ATG (common in Charadriiformes; see Paton and Baker 2006).                                                                                        |
| <b>COX1</b>                                                                                                                                                                                                                                         | 5,387                     | 6,938  | -            | -                          | -      | Start codon is GTG instead of ATG (common in Charadriiformes; see Paton and Baker 2006).                                                                                        |
| <b>COX3</b>                                                                                                                                                                                                                                         | 8,672                     | 9,456  | -            | -                          | -      | Stop codon is just a single T. TAA stop codon is completed by the addition of 3' A residues to the mRNA via polyadenylation (Ojala et al. 1981).                                |
| <i>References:</i>                                                                                                                                                                                                                                  |                           |        |              |                            |        |                                                                                                                                                                                 |
| <i>Mindell, D. P., M. D. Sorenson, and D. E. Dimcheff. 1998. "An Extra Nucleotide Is Not Translated in Mitochondrial ND3 of Some Birds and Turtles." Molecular Biology and Evolution 15 (11): 1568–71.</i>                                          |                           |        |              |                            |        |                                                                                                                                                                                 |
| <i>Paton, Tara A., and Allan J. Baker. 2006. "Sequences from 14 Mitochondrial Genes Provide a Well-Supported Phylogeny of the Charadriiform Birds Congruent with the Nuclear RAG-1 Tree." Molecular Phylogenetics and Evolution 39 (3): 657–67.</i> |                           |        |              |                            |        |                                                                                                                                                                                 |
| <i>Ojala, D., J. Montoya, and G. Attardi. 1981. "tRNA Punctuation Model of RNA Processing in Human Mitochondria." Nature 290 (5806): 470–74.</i>                                                                                                    |                           |        |              |                            |        |                                                                                                                                                                                 |

515

516  
517  
518  
519  
520  
521  
522  
523  
524  
525

**Table S3: Diversity and neutrality statistics for nuclear and mitochondrial genomes across 12 Atlantic Puffin colonies.** Values in bold are genomic clusters identified by the nuclear data analysis. Nuclear statistics were calculated using colony-based one-dimensional (1D) folded Site-Frequency-Spectra (SFS). A set of sites covered in all individuals and passing several quality filters without removing rare alleles was selected in ANGSD and the resulting dataset was further pruned by filtering out sites where heterozygote counts comprise more than 50% of all counts. Site allele frequency (SAF) likelihoods were estimated for each population, genomic cluster, and globally in ANGSD followed by calculating folded 1D-SFS with *realSFS*. Tajima's D and nucleotide diversity ( $\pi$ ) were computed per pseudo-chromosome utilizing the per-site  $\theta$  estimates. All mitogenome statistics and tests were calculated in Arlequin v.3.5. h = haplotype diversity.  $\pi$  = nucleotide diversity. SD = standard deviation.

| Colony             | Sample Size | Mitogenomes                |                        |                                   |               |                     |                                 |                | Nuclear Genomes                   |                         |
|--------------------|-------------|----------------------------|------------------------|-----------------------------------|---------------|---------------------|---------------------------------|----------------|-----------------------------------|-------------------------|
|                    |             | No. of distinct haplotypes | h $\pm$ SD             | $\pi \pm$ SD ( $\times 10^{-3}$ ) | Tajima's D    | Ewens-Watterson's F | Chakraborty's Test <sup>1</sup> | Fu's Fs        | $\pi \pm$ SD ( $\times 10^{-3}$ ) | Tajima's D $\pm$ SD     |
| Breiðafjörður      | 6           | 6                          | 1.000 +/- 0.096        | 0.62 +/- 0.38                     | -0.89         | N.A.                | 6/4.93                          | -0.88          | 3.28 +/- 0.30                     | 0.04 +/- 0.05           |
| Faroe              | 6           | 6                          | 1.000 +/- 0.096        | 0.94 +/- 0.57                     | -0.58         | N.A.                | 6/5.23                          | -0.29          | 3.28 +/- 0.29                     | 0.00 +/- 0.05           |
| Grimsey            | 6           | 6                          | 1.000 +/- 0.096        | 0.80 +/- 0.48                     | -1.22         | N.A.                | 6/5.12                          | -0.52          | 3.28 +/- 0.30                     | 0.00 +/- 0.05           |
| Hornøya            | 6           | 6                          | 1.000 +/- 0.096        | 0.78 +/- 0.47                     | -0.75         | N.A.                | 6/5.10                          | -0.56          | 3.23 +/- 0.27                     | 0.05 +/- 0.04           |
| Papey              | 6           | 5                          | 0.933 +/- 0.122        | 0.82 +/- 0.50                     | -0.26         | 0.22                | 5/5.14                          | 1.36           | 3.29 +/- 0.29                     | -0.01 +/- 0.05          |
| Røst               | 6           | 5                          | 0.933 +/- 0.122        | 0.55 +/- 0.34                     | -0.50         | 0.22                | 5/4.83                          | 0.69           | 3.24 +/- 0.29                     | 0.04 +/- 0.04           |
| Vestmannaeyjar     | 6           | 6                          | 1.000 +/- 0.096        | 0.98 +/- 0.59                     | -1.13         | N.A.                | 6/5.26                          | -0.24          | 3.30 +/- 0.29                     | -0.01 +/- 0.04          |
| <b>Main</b>        | <b>42</b>   | <b>39</b>                  | <b>0.997 +/- 0.006</b> | <b>0.79 +/- 0.40</b>              | <b>-2.17*</b> | <b>0.03</b>         | <b>39/19.43</b>                 | <b>-24.02*</b> | <b>3.27 +/- 0.29**</b>            | <b>0.02 +/- 0.05 **</b> |
| Gannet Isl.        | 6           | 6                          | 1.000 +/- 0.096        | 0.70 +/- 0.43                     | -0.42         | N.A.                | 6/5.03                          | -0.70          | 3.26 +/- 0.29                     | 0.07 +/- 0.04           |
| Gull Isl.          | 6           | 6                          | 1.000 +/- 0.096        | 0.76 +/- 0.46                     | -0.89         | N.A.                | 6/5.08                          | -0.59          | 3.13 +/- 0.71                     | 0.06 +/- 0.06           |
| <b>Canada</b>      | <b>12</b>   | <b>12</b>                  | <b>1.000 +/- 0.034</b> | <b>0.72 +/- 0.39</b>              | <b>-1.23</b>  | <b>N.A.</b>         | <b>12/8.59</b>                  | <b>-4.23*</b>  | <b>3.28 +/- 0.29</b>              | <b>-0.13 +/- 0.06</b>   |
| <b>Isle of May</b> | <b>5</b>    | <b>5</b>                   | <b>1.000 +/- 0.127</b> | <b>0.83 +/- 0.53</b>              | <b>-0.87</b>  | <b>N.A.</b>         | <b>5/4.41</b>                   | <b>0.09</b>    | <b>3.27 +/- 0.30</b>              | <b>0.12 +/- 0.05</b>    |
| <b>Spitsbergen</b> | <b>6</b>    | <b>5</b>                   | <b>0.933 +/- 0.122</b> | <b>0.67 +/- 0.41</b>              | <b>0.45</b>   | <b>0.22</b>         | <b>6/4.99</b>                   | <b>1.02</b>    | <b>3.09 +/- 0.28</b>              | <b>0.43 +/- 0.06</b>    |
| Bjørnøya           | 6           | 6                          | 1.000 +/- 0.096        | 0.78 +/- 0.47                     | -1.34         | N.A.                | 6/5.10                          | -0.56          | 3.23 +/- 0.28                     | 0.07 +/- 0.04           |
| <b>Total</b>       | <b>71</b>   | <b>66</b>                  | <b>0.998 +/- 0.003</b> | <b>0.77 +/- 0.39</b>              | <b>-2.33*</b> | <b>0.02</b>         | <b>66/24.73</b>                 | <b>-24.31*</b> | <b>3.24 +/- 0.34**</b>            | <b>0.07 +/- 0.12**</b>  |

\*Significant deviation from neutral expectation at  $\alpha=0.05$   
\*\*Mean of individual colony values due to a known unresolved bug in the ANGSD program (*thetaStat do\_stat* with a large SFS results in -NaN)  
<sup>1</sup>Number of haplotype sampled/expected number of haplotypes  
N.A. = The test is impossible because all haplotypes are different

526  
527  
528  
529  
530

531 **Table S4: Pairwise genetic distances between Atlantic Puffin colonies and genomic clusters identified by the analysis of nuclear and**  
532 **mitochondrial genomes.** Matrices contain pairwise  $F_{ST}$  (top diagonal) and  $\Phi_{ST}$  (bottom diagonal) values between A) 12 colonies and B) four genomic  
533 clusters. None of the  $\Phi_{ST}$  values are statistically significant ( $P < 0.05$ ). Pairwise  $F_{ST}$  values are based on folded two-dimensional (2D) Site-Frequency-Spectra  
534 (SFS), which were calculated using ANGSD as follows: Site allele frequency (SAF) likelihoods were estimated for each colony using a set of sites covered in  
535 all individuals and passing several quality filters (without removing rare alleles) including removing sites with heterozygote counts comprising more than 50%  
536 of all counts. Folded, 2D SFS were computed for each population pair in *realSFS* (ANGSD) and used together with the per-population SAF likelihoods to  
537 calculate the pairwise  $F_{ST}$  between each colony. The proportion of sequence variation ( $\Phi_{ST}$ ) was estimated for all pairs of populations using the mitogenome  
538 SNPs. Calculation of  $\Phi_{ST}$  was conducted in Arlequin applying 10,100 permutations and a Holm correction for multiple tests. None of them were significant.  
539

| <b>a</b>       |               |        |         |         |       |        |                |             |           |             |             |          |
|----------------|---------------|--------|---------|---------|-------|--------|----------------|-------------|-----------|-------------|-------------|----------|
|                | Breiðafjörður | Faroe  | Grimsey | Hornøya | Papey | Røst   | Vestmannaeyjar | Gannet Isl. | Gull Isl. | Isle of May | Spitsbergen | Bjørnøya |
| Breiðafjörður  | -             | 0.001  | 0.000   | 0.002   | 0.000 | 0.001  | 0.000          | 0.005       | 0.004     | 0.006       | 0.033       | 0.004    |
| Faroe          | -0.059        | -      | 0.002   | 0.002   | 0.001 | 0.002  | 0.001          | 0.006       | 0.004     | 0.007       | 0.034       | 0.005    |
| Grimsey        | -0.029        | -0.002 | -       | 0.002   | 0.001 | 0.002  | 0.001          | 0.006       | 0.005     | 0.007       | 0.034       | 0.004    |
| Hornøya        | -0.070        | 0.028  | -0.027  | -       | 0.002 | 0.001  | 0.002          | 0.007       | 0.005     | 0.007       | 0.034       | 0.004    |
| Papey          | 0.028         | -0.028 | 0.089   | 0.135   | -     | 0.002  | 0.001          | 0.005       | 0.004     | 0.007       | 0.035       | 0.004    |
| Røst           | -0.018        | 0.031  | 0.048   | 0.012   | 0.160 | -      | 0.002          | 0.006       | 0.005     | 0.007       | 0.034       | 0.004    |
| Vestmannaeyjar | -0.044        | -0.027 | -0.017  | -0.025  | 0.035 | 0.054  | -              | 0.005       | 0.004     | 0.007       | 0.034       | 0.004    |
| Gannet Isl.    | -0.050        | -0.038 | 0.069   | 0.030   | 0.055 | -0.023 | 0.026          | -           | 0.002     | 0.011       | 0.039       | 0.009    |
| Gull Isl.      | -0.088        | -0.078 | -0.032  | -0.042  | 0.016 | 0.002  | -0.071         | -0.033      | -         | 0.010       | 0.037       | 0.007    |
| Isle of May    | -0.029        | 0.019  | -0.014  | -0.067  | 0.129 | 0.052  | -0.093         | 0.061       | -0.073    | -           | 0.040       | 0.010    |
| Spitsbergen    | 0.024         | 0.051  | 0.069   | 0.045   | 0.165 | -0.021 | 0.081          | 0.058       | 0.029     | 0.082       | -           | 0.018    |
| Bjørnøya       | -0.098        | -0.051 | -0.019  | -0.023  | 0.012 | -0.003 | -0.049         | -0.009      | -0.076    | -0.019      | -0.026      | -        |

  

| <b>b</b>    |        |        |             |             |
|-------------|--------|--------|-------------|-------------|
|             | Main   | Canada | Isle of May | Spitsbergen |
| Main        | -      | 0.004  | 0.006       | 0.033       |
| Canada      | -0.016 | -      | 0.010       | 0.037       |
| Isle of May | -0.001 | 0.012  | -           | 0.040       |
| Spitsbergen | 0.044  | 0.048  | 0.082       | -           |

540  
541  
542  
543



544 **Table S5: Overview of Isolation By Distance (IBD) analyses among 12 Atlantic puffin colonies.**  
545 Pairwise Slatkin's linearized  $F_{ST}$  values were used as genetic distances and pairwise Least Cost Path  
546 distances (over water only) as geographic distances. The significance of the correlation between the  
547 two distance matrices was assessed with a Mantel test and a Multiple Regression on Distance Matrix  
548 (MRM) analysis. For the global distance-based redundancy analysis (dbRDA) the explanatory  
549 variables included the geographic distance matrix transformed to Moran's Eigenvector Maps and the  
550 mean sea surface temperature at each puffin colony in the breeding season in the last 50 years. For  
551 all three analyses, colonies were sequentially removed from the dataset to increase the proportion of  
552 explained genetic variance. Variance Explained (MRM) = Proportion of variance in genetic distance  
553 explained by geographic distance. Variance Explained (dbRDA) = Proportion of variance in genetic  
554 distance explained by spatial parameters. \*Gannet Island was not removed from the global dbRDA as  
555 it resulted in a non-significant model with substantially decreased explained variance.

| Removed colonies                                           | MRM Analysis           |                                             |         | Mantel Test |         | Global dbRDA           |         |         |
|------------------------------------------------------------|------------------------|---------------------------------------------|---------|-------------|---------|------------------------|---------|---------|
|                                                            | Variance Explained (%) | Regression Coefficient ( $\times 10^{-6}$ ) | P-value | R-value     | P-value | Variance Explained (%) | F-value | P-value |
| -                                                          | 3.69                   | 1.91                                        | 0.354   | 0.192       | 0.172   | 18.76                  | 1.85    | 0.075   |
| Spitsbergen                                                | 37.58                  | 1.37                                        | 0.003   | 0.613       | 0.002   | 41.73                  | 3.39    | 0.004   |
| Björnøya                                                   | 4.83                   | 2.37                                        | 0.446   | 0.220       | 0.196   | 21.39                  | 1.91    | 0.216   |
| Breiðafjörður                                              | 2.49                   | 1.55                                        | 0.457   | 0.158       | 0.192   | 17.14                  | 1.69    | 0.159   |
| Faroe                                                      | 2.82                   | 1.68                                        | 0.463   | 0.168       | 0.184   | 17.29                  | 1.70    | 0.106   |
| Grímsey                                                    | 2.66                   | 1.62                                        | 0.472   | 0.163       | 0.192   | 26.53                  | 2.20    | 0.033   |
| Hornøya                                                    | 7.77                   | 2.94                                        | 0.213   | 0.279       | 0.18    | 38.91                  | 3.12    | 0.008   |
| Papey                                                      | 2.52                   | 1.59                                        | 0.486   | 0.159       | 0.18    | 17.64                  | 1.71    | 0.125   |
| Røst                                                       | 4.76                   | 2.21                                        | 0.409   | 0.218       | 0.19    | 17.37                  | 1.70    | 0.105   |
| Vestmannaeyjar                                             | 2.35                   | 1.52                                        | 0.506   | 0.153       | 0.205   | 19.43                  | 1.80    | 0.086   |
| Gannet Isl.                                                | 3.12                   | 1.94                                        | 0.338   | 0.177       | 0.105   | 21.24                  | 2.35    | 0.084   |
| Gull Isl.                                                  | 4.92                   | 2.72                                        | 0.232   | 0.222       | 0.12    | 16.62                  | 1.66    | 0.15    |
| Isle of May                                                | 3.28                   | 1.79                                        | 0.426   | 0.181       | 0.175   | 17.55                  | 1.71    | 0.128   |
| Spitsbergen +                                              |                        |                                             |         |             |         |                        |         |         |
| Björnøya                                                   | 38.60                  | 1.39                                        | 0.006   | 0.621       | 0.005   | 41.37                  | 3.12    | 0.015   |
| Breiðafjörður                                              | 34.14                  | 1.23                                        | 0.005   | 0.584       | 0.006   | 44.06                  | 3.36    | 0.002   |
| Faroe                                                      | 37.39                  | 1.38                                        | 0.006   | 0.612       | 0.004   | 42.06                  | 3.18    | 0.004   |
| Grímsey                                                    | 33.41                  | 1.27                                        | 0.011   | 0.578       | 0.007   | 44.89                  | 3.44    | 0.004   |
| Hornøya                                                    | 45.66                  | 1.63                                        | 0.003   | 0.676       | 0.005   | 42.46                  | 4.32    | 0.001   |
| Papey                                                      | 33.89                  | 1.30                                        | 0.011   | 0.582       | 0.01    | 42.76                  | 3.24    | 0.001   |
| Røst                                                       | 39.39                  | 1.43                                        | 0.006   | 0.628       | 0.006   | 43.33                  | 3.29    | 0.004   |
| Vestmannaeyjar                                             | 34.51                  | 1.29                                        | 0.008   | 0.587       | 0.004   | 48.11                  | 3.78    | 0.003   |
| Gannet Isl.                                                | 27.01                  | 1.19                                        | 0.091   | 0.520       | 0.094   | 28.16                  | 2.76    | 0.046   |
| Gull Isl.                                                  | 37.68                  | 1.67                                        | 0.029   | 0.614       | 0.034   | 36.09                  | 2.69    | 0.023   |
| Isle of May                                                | 65.92                  | 1.37                                        | 0.002   | 0.812       | 0.001   | 50.86                  | 4.11    | 0.008   |
| Spitsbergen/<br>Isle of May +                              |                        |                                             |         |             |         |                        |         |         |
| Björnøya                                                   | 77.49                  | 1.39                                        | 0.002   | 0.880       | 0.001   | 59.87                  | 4.98    | 0.014   |
| Breiðafjörður                                              | 65.33                  | 1.26                                        | 0.003   | 0.808       | 0.001   | 49.95                  | 3.66    | 0.009   |
| Faroe                                                      | 64.13                  | 1.34                                        | 0.003   | 0.801       | 0.001   | 49.60                  | 3.62    | 0.014   |
| Grímsey                                                    | 62.37                  | 1.31                                        | 0.001   | 0.790       | 0.002   | 57.01                  | 4.54    | 0.004   |
| Hornøya                                                    | 77.87                  | 1.62                                        | 0.001   | 0.882       | 0.001   | 54.66                  | 5.82    | 0.006   |
| Papey                                                      | 62.47                  | 1.32                                        | 0.001   | 0.790       | 0.002   | 52.40                  | 3.94    | 0.007   |
| Røst                                                       | 67.93                  | 1.42                                        | 0.004   | 0.824       | 0.002   | 51.93                  | 3.88    | 0.009   |
| Vestmannaeyjar                                             | 63.52                  | 1.32                                        | 0.002   | 0.797       | 0.002   | 49.45                  | 3.61    | 0.014   |
| Gannet Isl.                                                | 58.79                  | 1.16                                        | 0.004   | 0.767       | 0.001   | 36.31                  | 3.28    | 0.002   |
| Gull Isl.                                                  | 63.59                  | 1.60                                        | 0.001   | 0.797       | 0.003   | 45.88                  | 3.26    | 0.005   |
| Spitsbergen/<br>Isle of May/<br>Björnøya +                 |                        |                                             |         |             |         |                        |         |         |
| Breiðafjörður                                              | 79.50                  | 1.31                                        | 0.002   | 0.892       | 0.002   | 61.27                  | 4.69    | 0.033   |
| Faroe                                                      | 76.54                  | 1.39                                        | 0.002   | 0.875       | 0.003   | 59.57                  | 4.44    | 0.027   |
| Grímsey                                                    | 75.96                  | 1.36                                        | 0.002   | 0.872       | 0.002   | 61.80                  | 4.78    | 0.035   |
| Hornøya                                                    | 83.91                  | 1.59                                        | 0.007   | 0.916       | 0.004   | 64.75                  | 7.43    | 0.015   |
| Papey                                                      | 75.38                  | 1.38                                        | 0.003   | 0.868       | 0.003   | 63.23                  | 5.01    | 0.02    |
| Røst                                                       | 75.10                  | 1.39                                        | 0.004   | 0.867       | 0.004   | 63.68                  | 5.09    | 0.013   |
| Vestmannaeyjar                                             | 77.59                  | 1.38                                        | 0.002   | 0.881       | 0.002   | 59.30                  | 4.40    | 0.055   |
| Gannet Isl.                                                | 84.98                  | 1.19                                        | 0.001   | 0.922       | 0.002   | 39.64                  | 3.30    | 0.082   |
| Gull Isl.                                                  | 76.77                  | 1.61                                        | 0.001   | 0.876       | 0.002   | 50.75                  | 3.40    | 0.029   |
| Spitsbergen/<br>Isle of May/<br>Björnøya/<br>Gannet Isl. + |                        |                                             |         |             |         |                        | *       |         |
| Breiðafjörður                                              | 89.10                  | 1.12                                        | 0.001   | 0.944       | 0.002   |                        |         |         |
| Faroe                                                      | 85.43                  | 1.23                                        | 0.004   | 0.924       | 0.009   |                        |         |         |
| Grímsey                                                    | 84.37                  | 1.17                                        | 0.004   | 0.919       | 0.004   |                        |         |         |
| Hornøya                                                    | 90.62                  | 1.37                                        | 0.009   | 0.952       | 0.009   |                        |         |         |
| Papey                                                      | 85.11                  | 1.20                                        | 0.003   | 0.923       | 0.001   |                        |         |         |
| Røst                                                       | 83.80                  | 1.19                                        | 0.008   | 0.915       | 0.006   |                        |         |         |
| Vestmannaeyjar                                             | 85.64                  | 1.20                                        | 0.005   | 0.925       | 0.003   |                        |         |         |
| Gull Isl.                                                  | 60.08                  | 0.76                                        | 0.006   | 0.775       | 0.012   |                        |         |         |

557 **Table S6: Detailed results of significance tests for the optimized and partial distance-based redundancy analysis (dbRDA) on 12 Atlantic puffin**  
558 **colonies.** The genetic distance matrix consisted of pairwise Slatkin's linearized  $F_{ST}$  values. Explanatory variables included a geographic distance matrix  
559 consisting of pairwise Least Cost Path distances (only over water) transformed to Moran's Eigenvector Maps and the mean sea surface temperature at each  
560 puffin colony in the breeding season in the last 50 years. After removing the Spitsbergen colony from the dataset, the global dbRDA was significant. In the  
561 resulting optimized model, a geographical and environmental variable significantly contributed to the observed genetic variation. Their individual contribution  
562 was estimated in a partial dbRDA followed by variation partitioning. Variance Explained = Proportion of variance in genetic distance explained by spatial  
563 features. D.f. = Degrees of Freedom. MEM = Moran's Eigenvector Map. SSTmean = Mean sea surface temperature at each puffin colony in the breeding  
564 season in the last 50 years.

|                     |          | Optimized dbRDA        |      |         |         | Partial dbRDA          |      |         |         |
|---------------------|----------|------------------------|------|---------|---------|------------------------|------|---------|---------|
|                     |          | Variance Explained (%) | D.f. | F-value | P-value | Variance Explained (%) | D.f. | F-value | P-value |
| Spitsbergen Removed | MEM1     | 29.38                  | 1    | 5.16    | 0.006   | 28.66                  | 1    | 5.35    | 0.005   |
|                     | SSTmean  | 11.37                  | 1    | 2.73    | 0.018   | 11.37                  | 1    | 2.73    | 0.024   |
|                     | Residual | 59.25                  | 7    | -       | -       | 59.25                  | 7    | -       | -       |

565  
566

567  
568  
569  
570  
571  
572  
573  
574

**Table S7: Significant admixture signal between 12 Atlantic Puffin colonies as revealed by  $f_3$ -statistics.** Statistics were calculated in Treemix using the consensus base at each of 1,093,765 polymorphic nuclear sites for each of the 71 puffins, and determined for each unique combination of the ((A,B),C) topology involving the 12 puffin populations. Only significant (Z-score < -3) topologies are shown in the table, each providing evidence of admixture between population A and B in population C ("Admixed").

| Admixed | A   | B   | $f_3$    | stdErr | Zscore |
|---------|-----|-----|----------|--------|--------|
| BJO     | PAP | SPI | -0.00150 | 0.0001 | -23.79 |
| BJO     | GUL | SPI | -0.00148 | 0.0001 | -23.05 |
| BJO     | GRI | SPI | -0.00147 | 0.0001 | -23.41 |
| BJO     | FAR | SPI | -0.00144 | 0.0001 | -22.88 |
| BJO     | GAN | SPI | -0.00143 | 0.0001 | -22.63 |
| BJO     | HOR | SPI | -0.00143 | 0.0001 | -22.46 |
| BJO     | WES | SPI | -0.00142 | 0.0001 | -22.44 |
| BJO     | ROS | SPI | -0.00141 | 0.0001 | -22.94 |
| BJO     | BRE | SPI | -0.00141 | 0.0001 | -22.53 |
| BJO     | IOM | SPI | -0.00135 | 0.0001 | -20.75 |

575  
576

577 **5. Supplementary Figures**

578

579

580

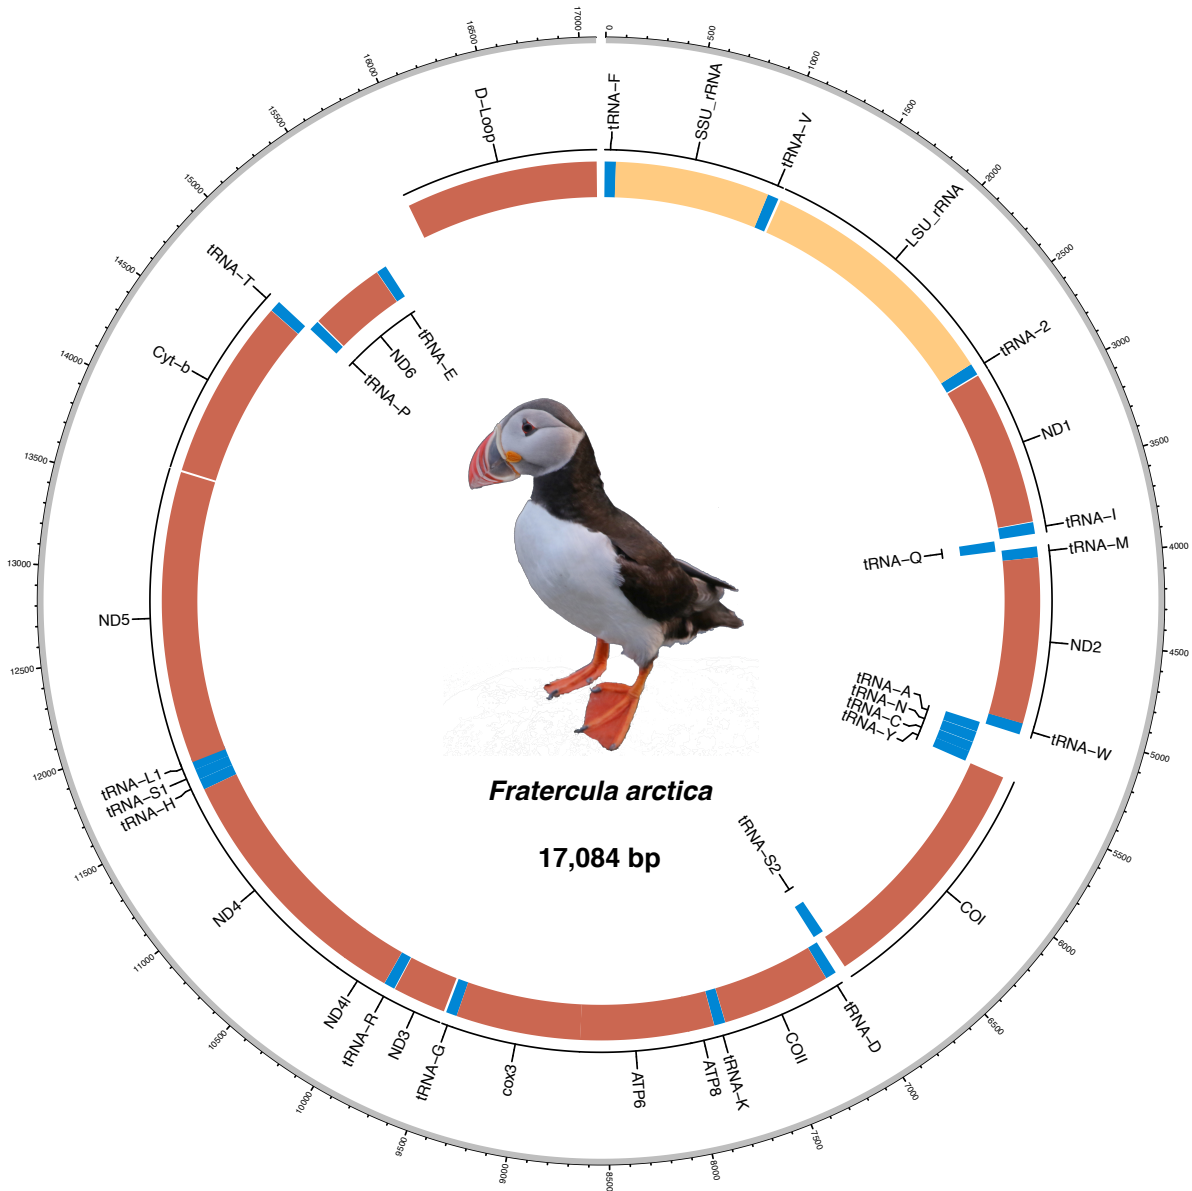

581

582

583 **Figure S1: Circular representation of the annotated mitogenome of the Atlantic puffin.** Protein  
 584 coding regions are highlighted in red, tRNAs in blue, and rRNAs in yellow. Outer ring depicts position  
 585 in bp. Annotation was performed with the MITOS web server and the plot was produced with  
 586 shinyCircos. Puffin image credit: Annemarie Loof.

587

588

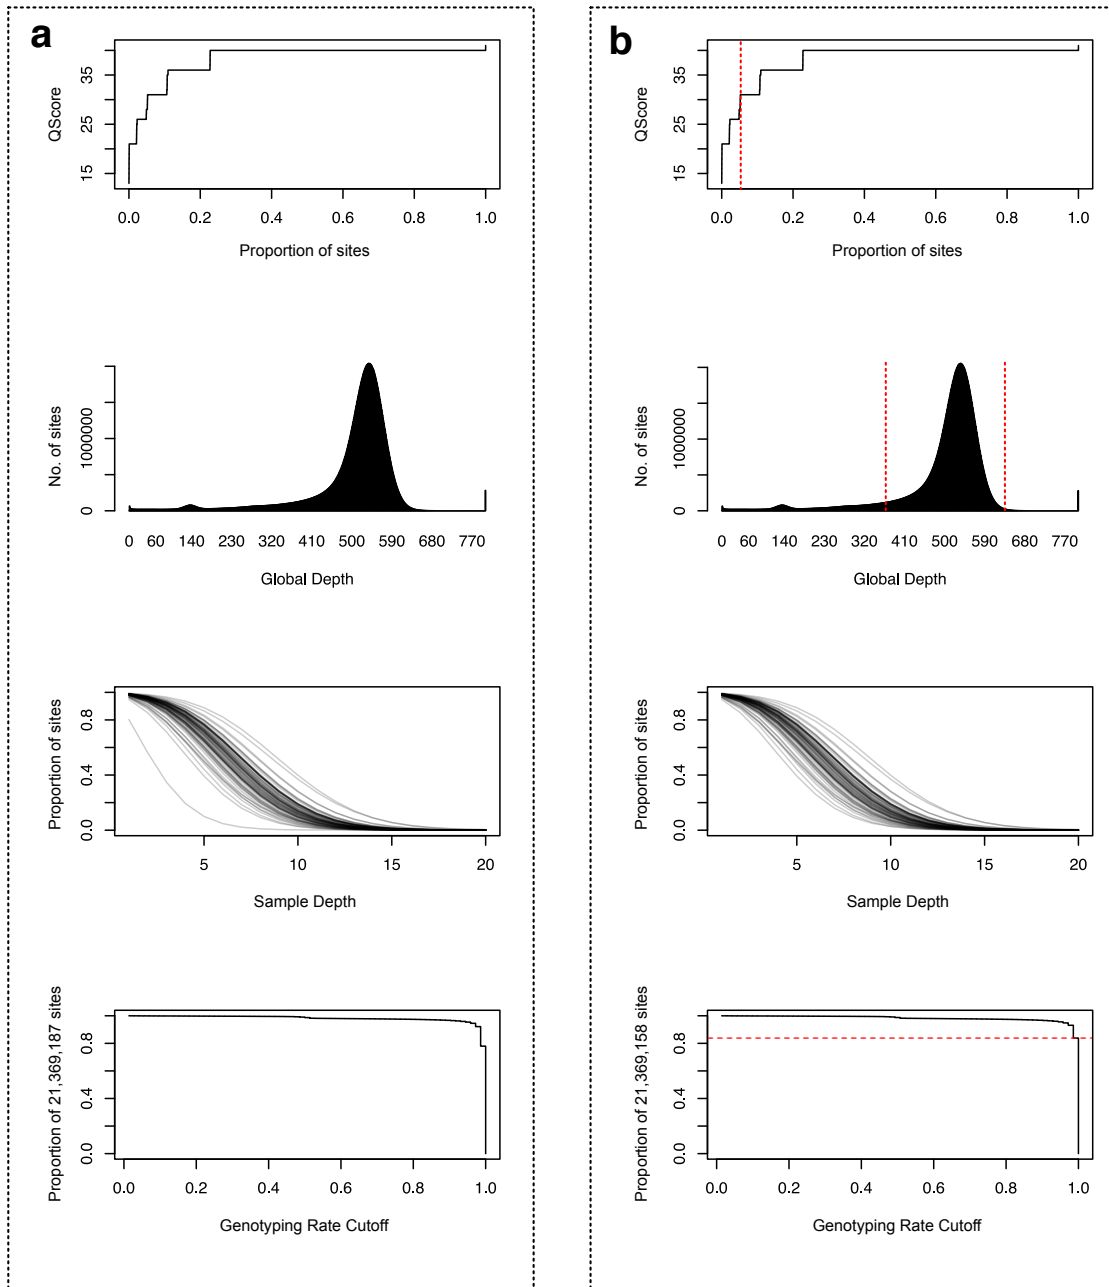

589  
 590  
 591  
 592  
 593  
 594  
 595  
 596  
 597

**Figure S2: Mapping quality control of 72 Atlantic puffin samples aligned to the newly assembled draft genome.** One sample had very low endogenous DNA content and low coverage across all sites in a) and was removed in b). Cutoffs for genotyping rate, global depth and QScore (red lines) were chosen for downstream genotype likelihood calculations.

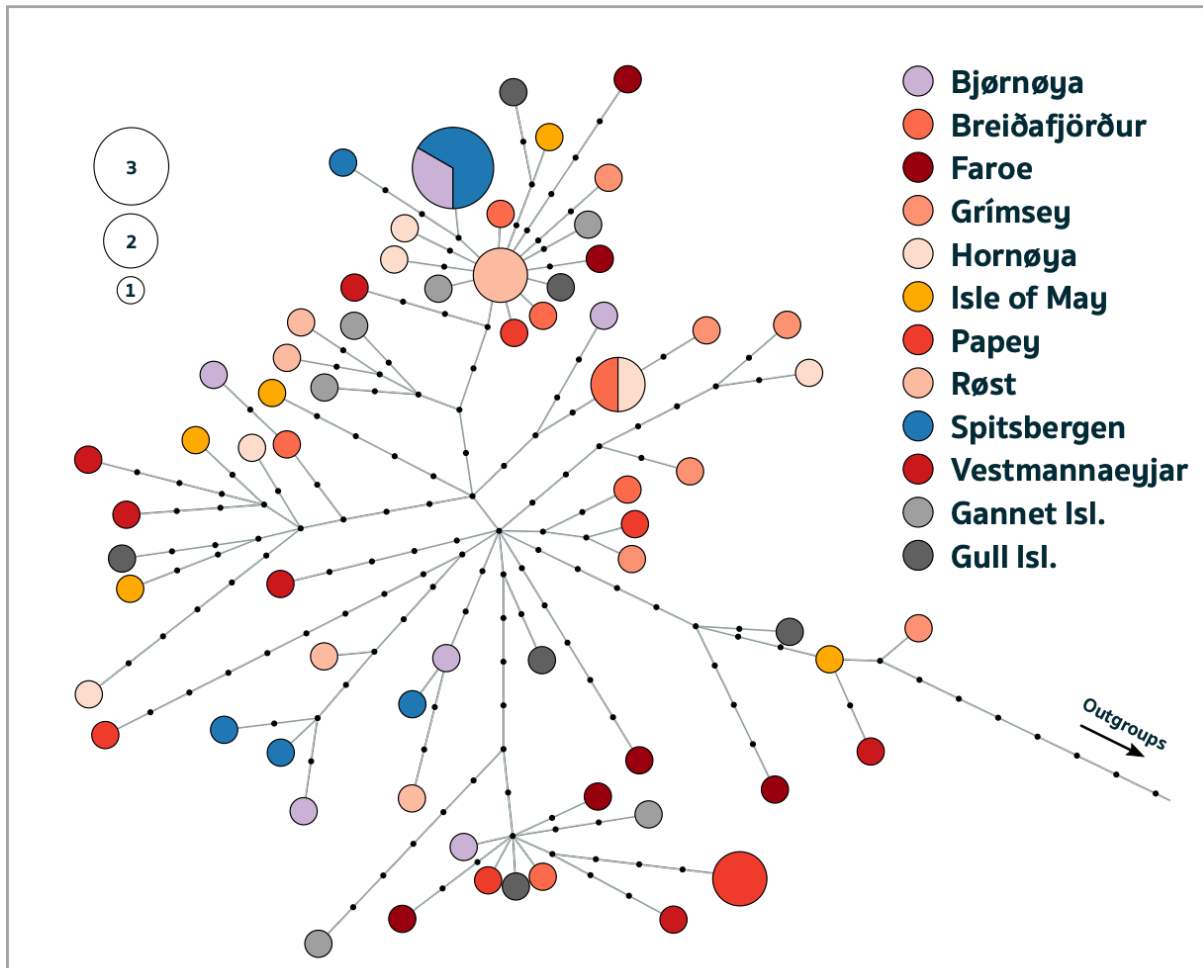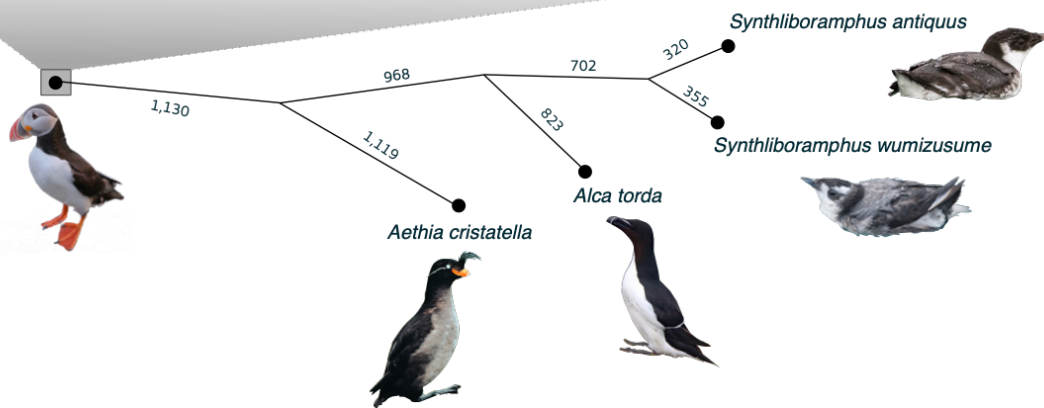

598  
599  
600  
601  
602  
603  
604  
605  
606  
607  
608  
609

**Figure S3: Haplotype network for 71 Atlantic puffin mitogenomes.** The network was constructed using the program Fitchi and a Maximum Likelihood tree generated in IQTree. It contains 66 unique haplotypes identified by 192 SNPs. Sizes of circles are proportional to haplotype abundance. Black dots represent inferred haplotypes that were not found in the present sampling. Different colonies are indicated using different colors consistent with the remaining manuscript. Numbers in the outgroup tree refer to the number of substitutions between mitogenomes. Outgroup images were used under the Creative Commons license and retrieved from following authors on Wiki Commons or flickr: Eric Ellingson (Ancient Murrelet), “pseudolapiz” (Japanese Murrelet), Gunther Tschuch (Razorbill) and F. Deines (Crested Auklet).

610

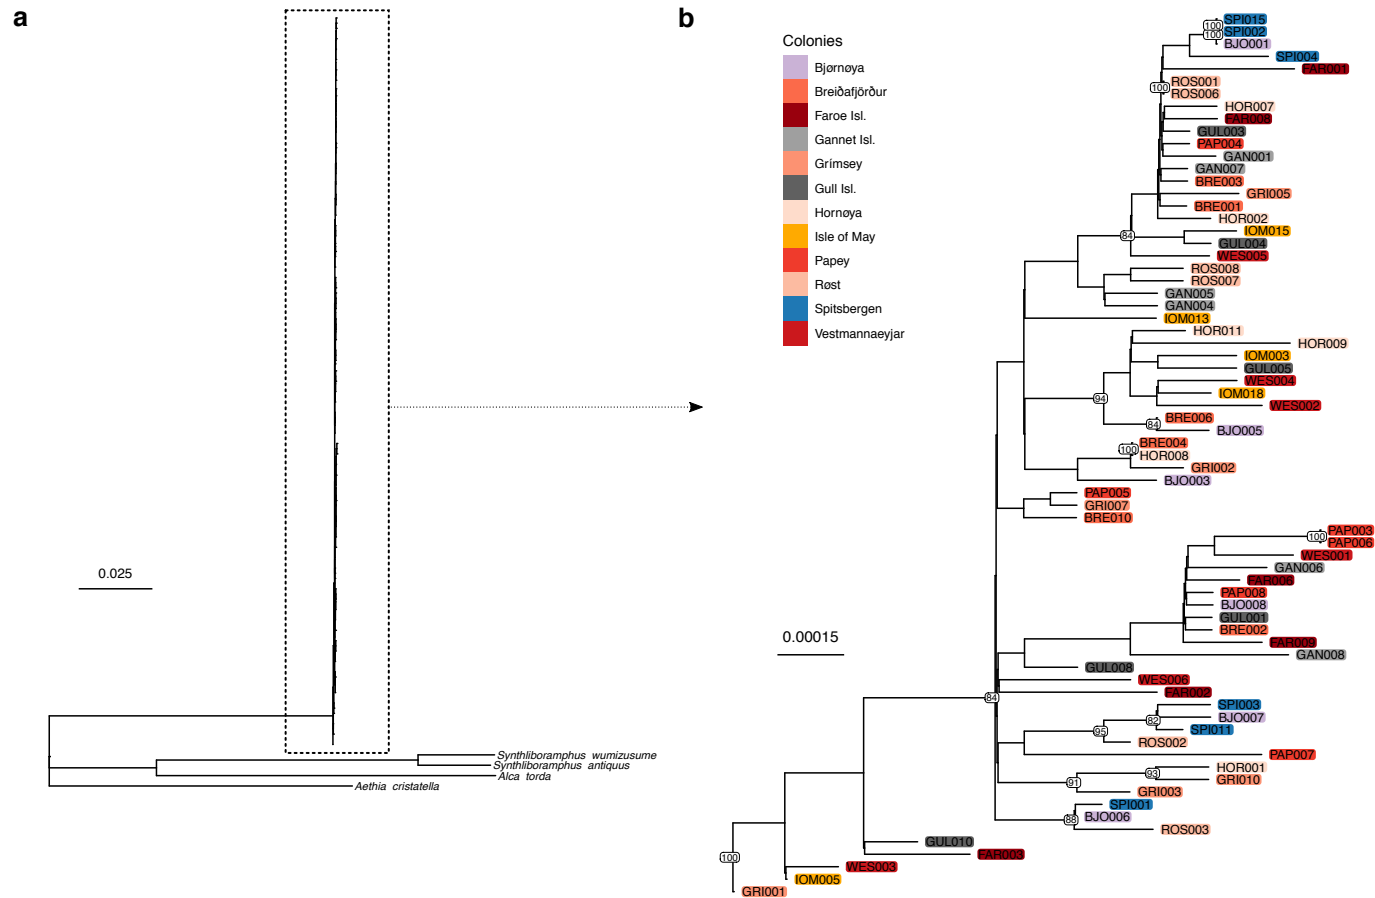

611

612

613 **Figure S4: Mitogenome phylogeny including 12 Atlantic puffin colonies across the species' breeding range.** The maximum likelihood tree was  
 614 generated in IQTree using an alignment of 71 puffin and four outgroup species mitogenomes. The outgroups are members of the same bird family (Alcidae).  
 615 The alignment was split into seven partitions, i.e. one partition for a concatenated alignment of each of the three codon positions of the protein coding genes,  
 616 one partition for the concatenated alignment of the rRNA regions, one partition for the concatenated alignment of the tRNAs, one partition for the alignment of  
 617 the control region, and one partition for the concatenated alignment of the "intergenic" regions. The tree was visualized a) with and b) without the outgroups.  
 618 Different colonies are indicated using different colors consistent with the main manuscript and node labels show bootstrap support.

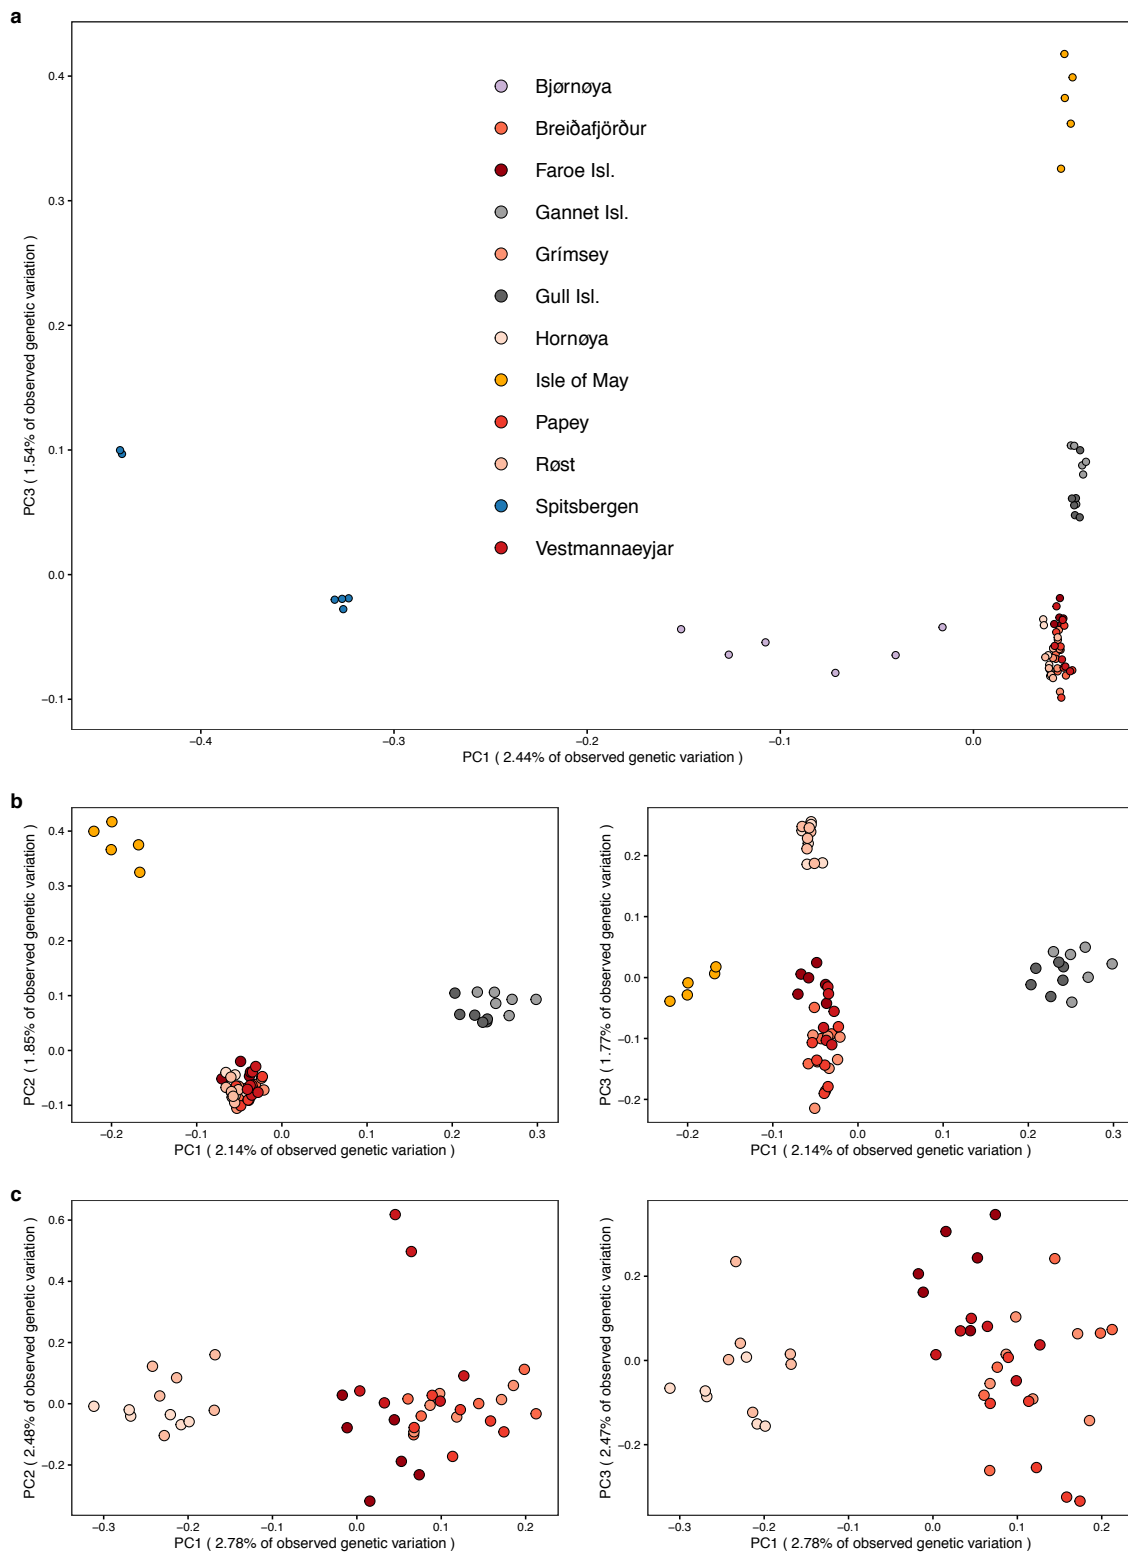

620

621

622 **Figure S5: Principal component analyses (PCAs) of genotype likelihoods across 12 Atlantic**623 **puffin colonies.** The data consisted of 71 puffin samples and 1,093,765 polymorphic nuclear sites

624 and was projected onto a) PC1 and PC3, but was also subsampled to b) exclude the Spitsbergen and

625 Bjørnøya colonies and to c) only include the mainland Norwegian, Icelandic and Faroese colonies.

626 Different colonies are indicated using different colors consistent with the main manuscript.



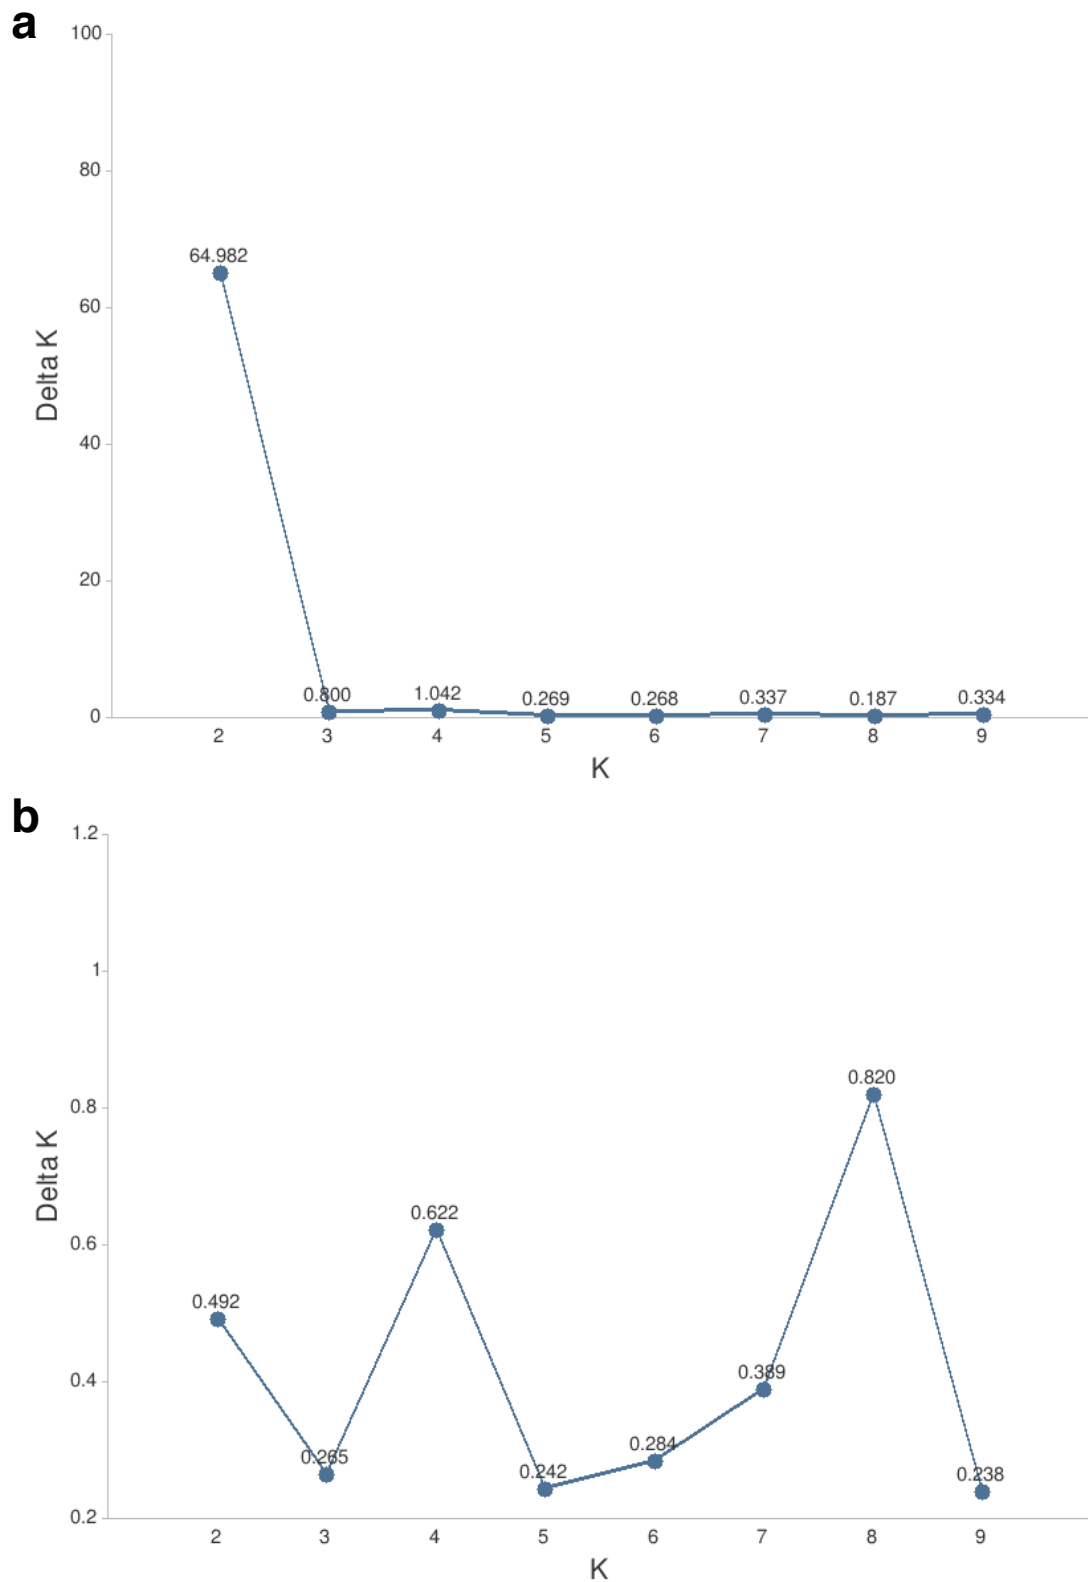

628

629

630 **Figure S6: Delta K as a function of the no. of ancestral clusters (K) as calculated by the**  
 631 **method of Evanno et al. (2005) for K = 1-9. The optimal K for the admixture analysis including a)**  
 632 **genotype likelihood panel consisting of 71 individuals and 1,093,765 polymorphic nuclear sites and b)**  
 633 **a subset of this dataset comprised of 59 individuals (after removing individuals from Spitsbergen and**  
 634 **Bjørnøya) is determined by the largest delta K(s).**

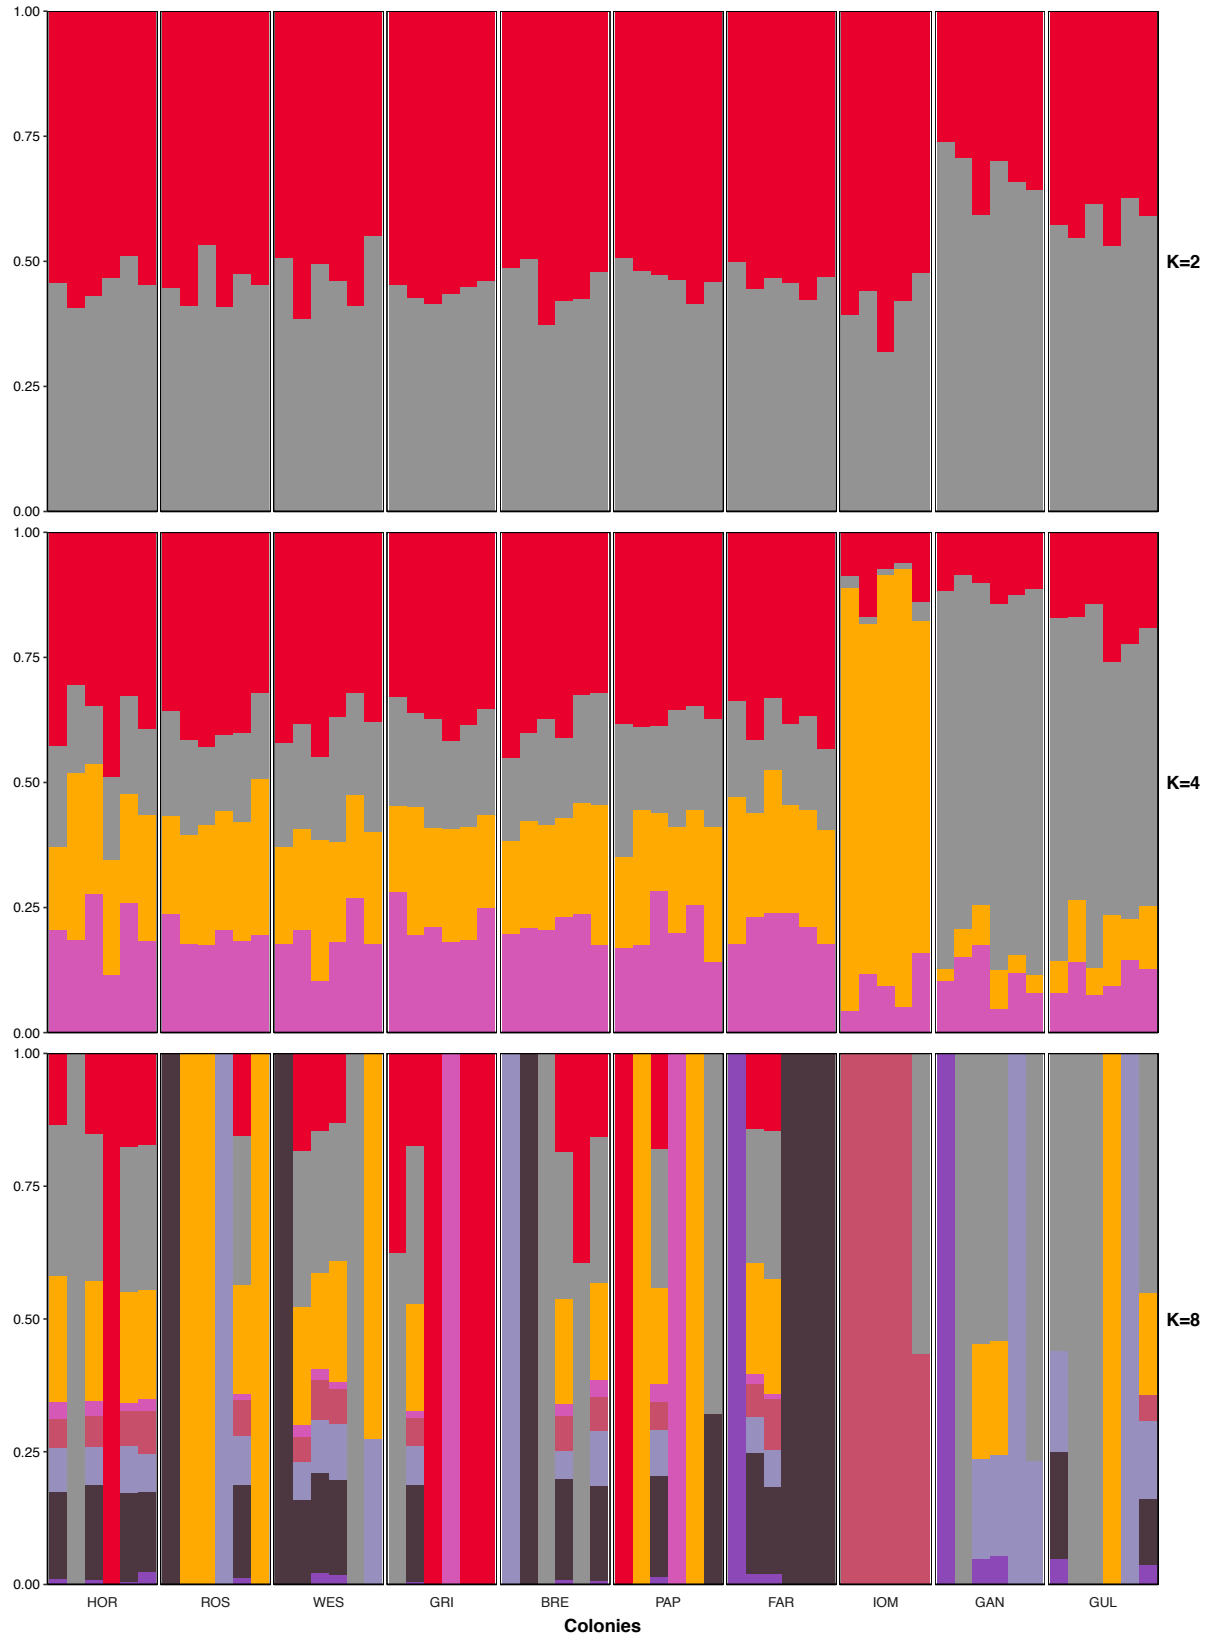

636  
 637  
 638  
 639  
 640  
 641

**Figure S7: CLUMPAK-averaged admixture plots of the best K's for a subset of the Atlantic puffin genotype likelihood panel after excluding Spitsbergen and Bjørnøya individuals. Each column represents a sample and colonies are separated by solid white lines. Optimal K's were determined by the method of Evanno et al. (2005) (See Figure S6b).**

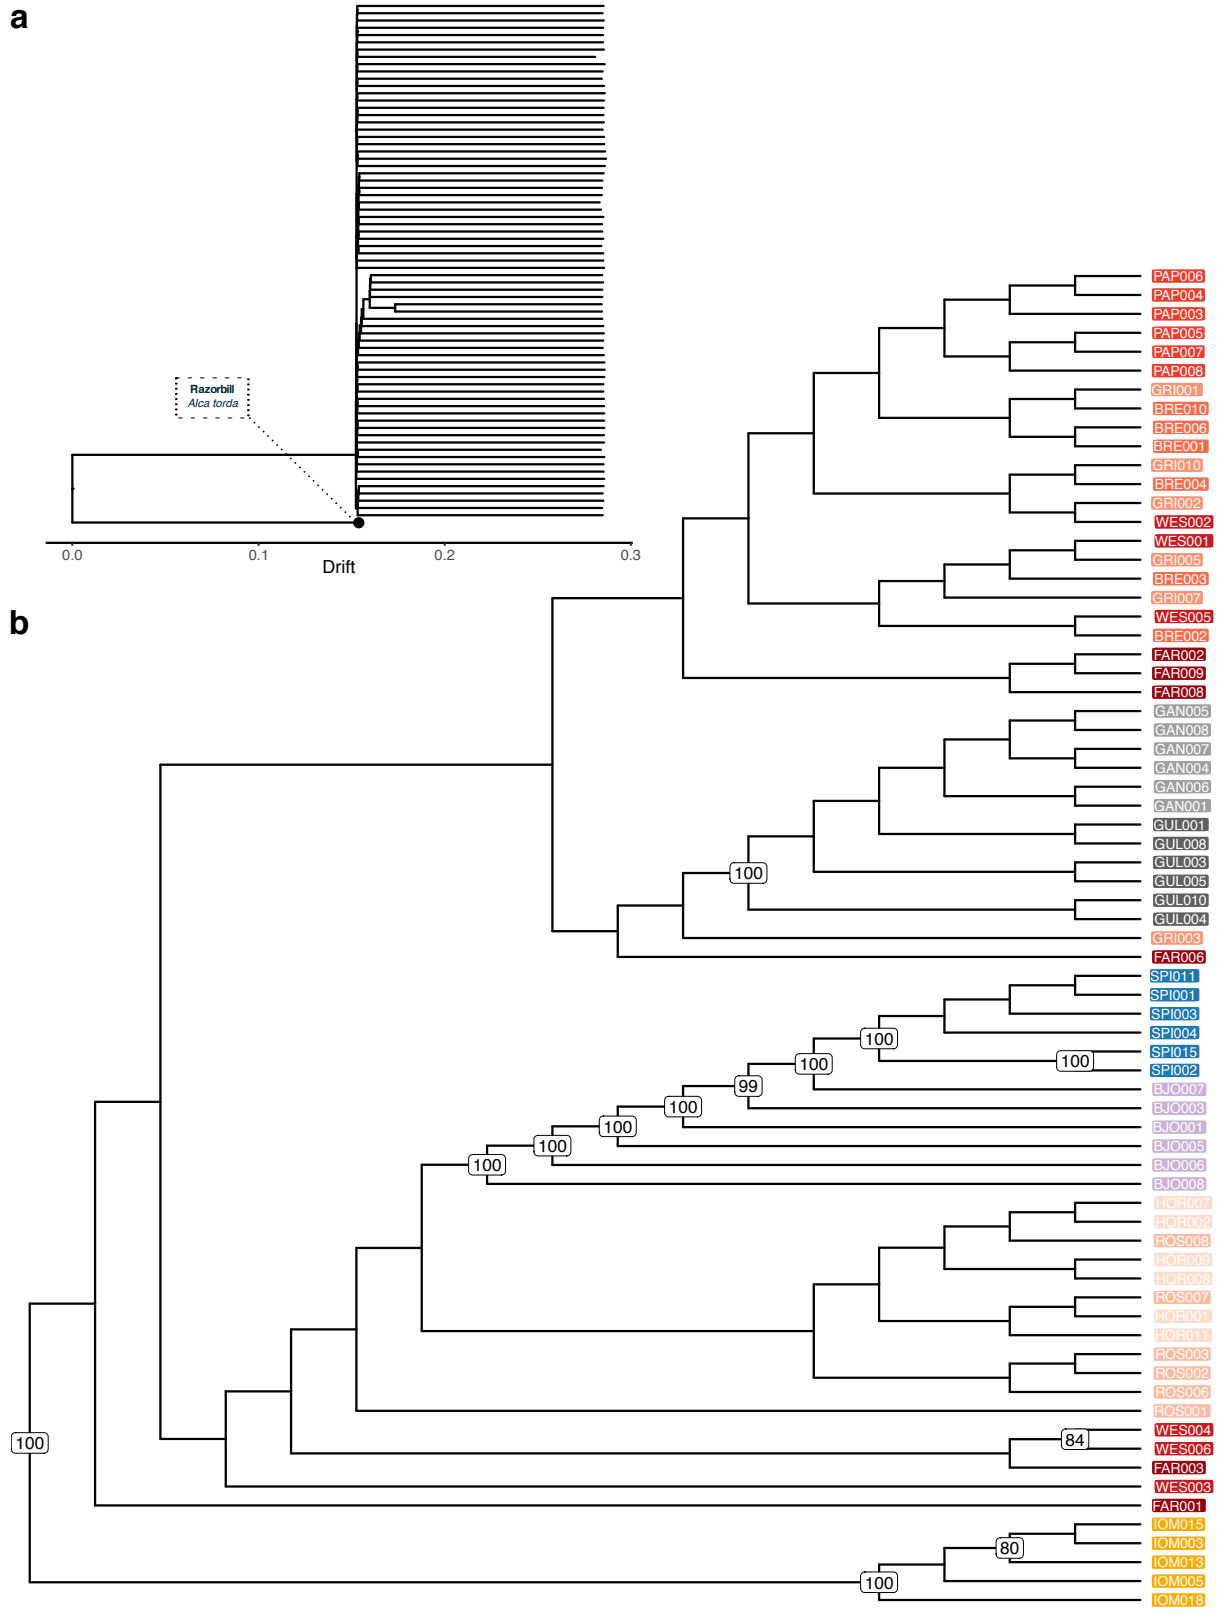

643  
644  
645  
646  
647  
648

**Figure S8: Individual-based Treemix analysis of 71 Atlantic puffins.** The maximum likelihood analysis used allele frequencies at 1,093,765 polymorphic nuclear sites and the razorbill as outgroup. The output was visualized a) with and b) without branch lengths and outgroup. Different colonies are indicated using different colors consistent with the main manuscript. Node labels show bootstrap support > 80.

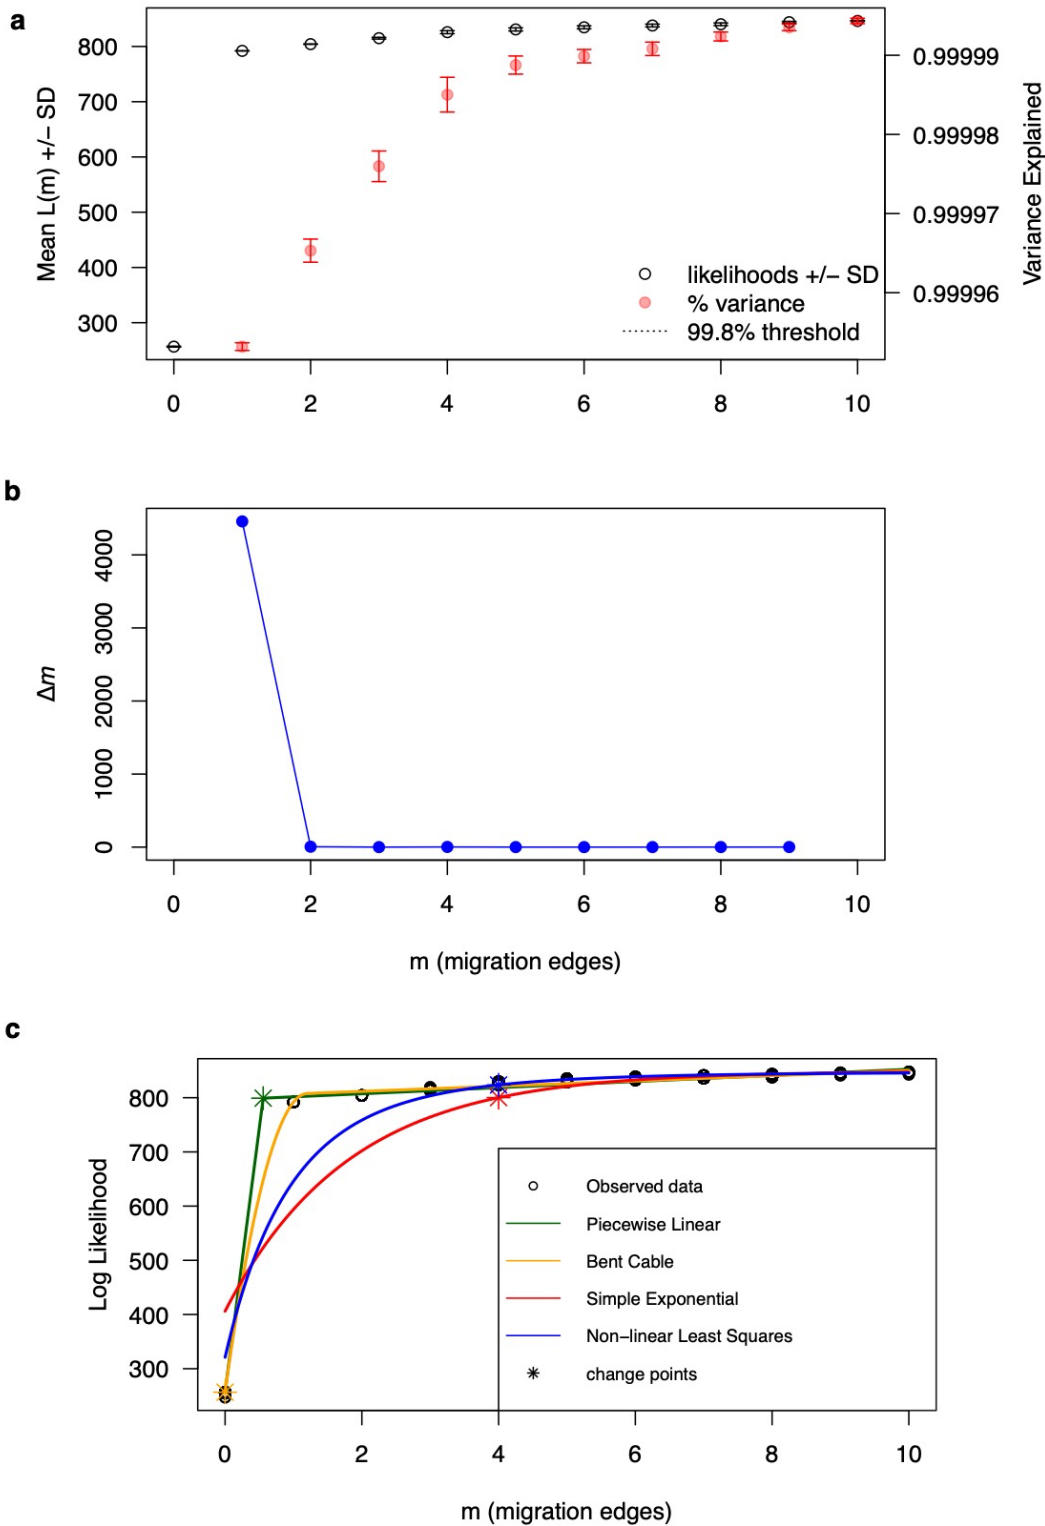

650  
 651  
 652  
 653  
 654  
 655  
 656  
 657

**Figure S9: Estimation of the optimal number of migration edges (m) for a Treemix generated population-based maximum likelihood tree using optM.** OptM utilized the output of 100 replicate Treemix runs across m = 1-10. The program estimated the best m using a) the distribution of the mean log likelihoods and % explained variance for each m and b) an *ad hoc* statistic based on the second order rate of change in the log likelihood weighted by the standard deviation. c) The selection of the best m is checked by various threshold models.

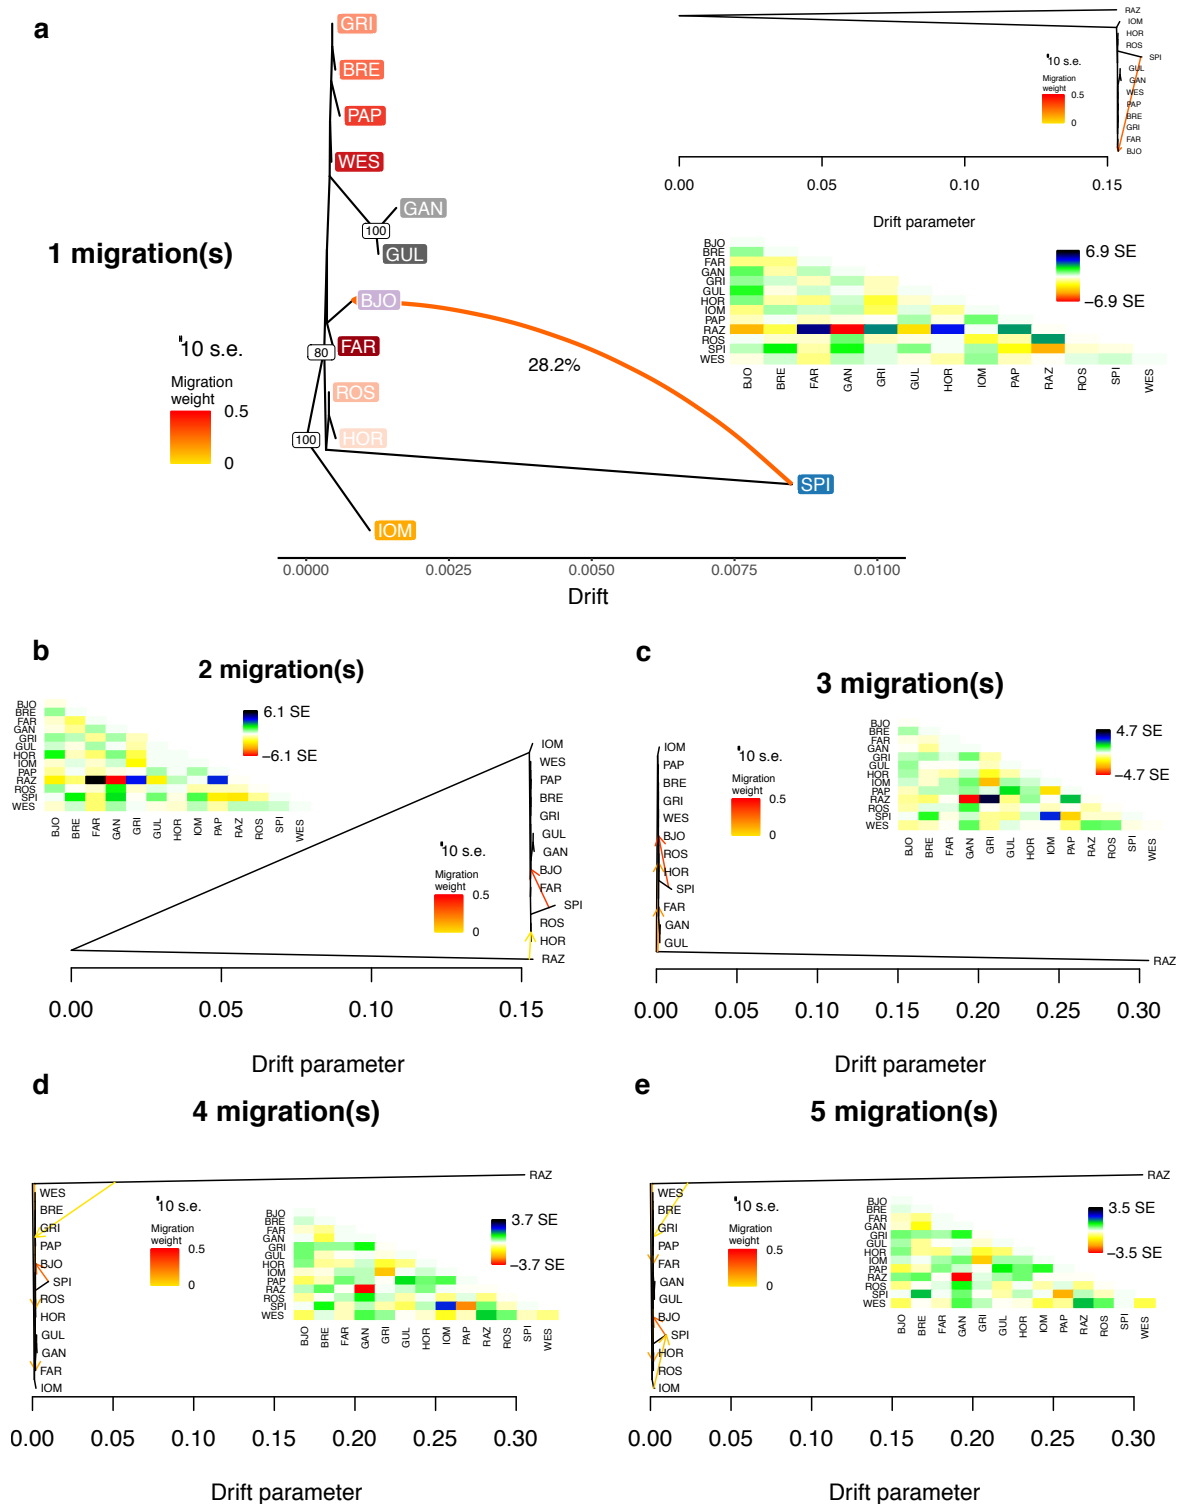

659  
 660  
 661  
 662  
 663  
 664  
 665  
 666  
 667

**Figure S10: Population-based Treemix analyses of 12 Atlantic puffin colonies applying up to 5 migrations.** The phylogenies were constructed using allele frequencies at 1,093,765 polymorphic nuclear sites and adding 1-5 (a-e) migration edges. Migrations are shown as arrows and their weight are indicated by a color range. Branch lengths are equivalent to a genetic drift parameter. The heatmaps highlight the residual fit of the tree displaying the standard error of the covariance between populations. All trees are rooted using the razorbill as an outgroup. Node labels in a) show bootstrap support  $\geq 80$ .

668  
669  
670

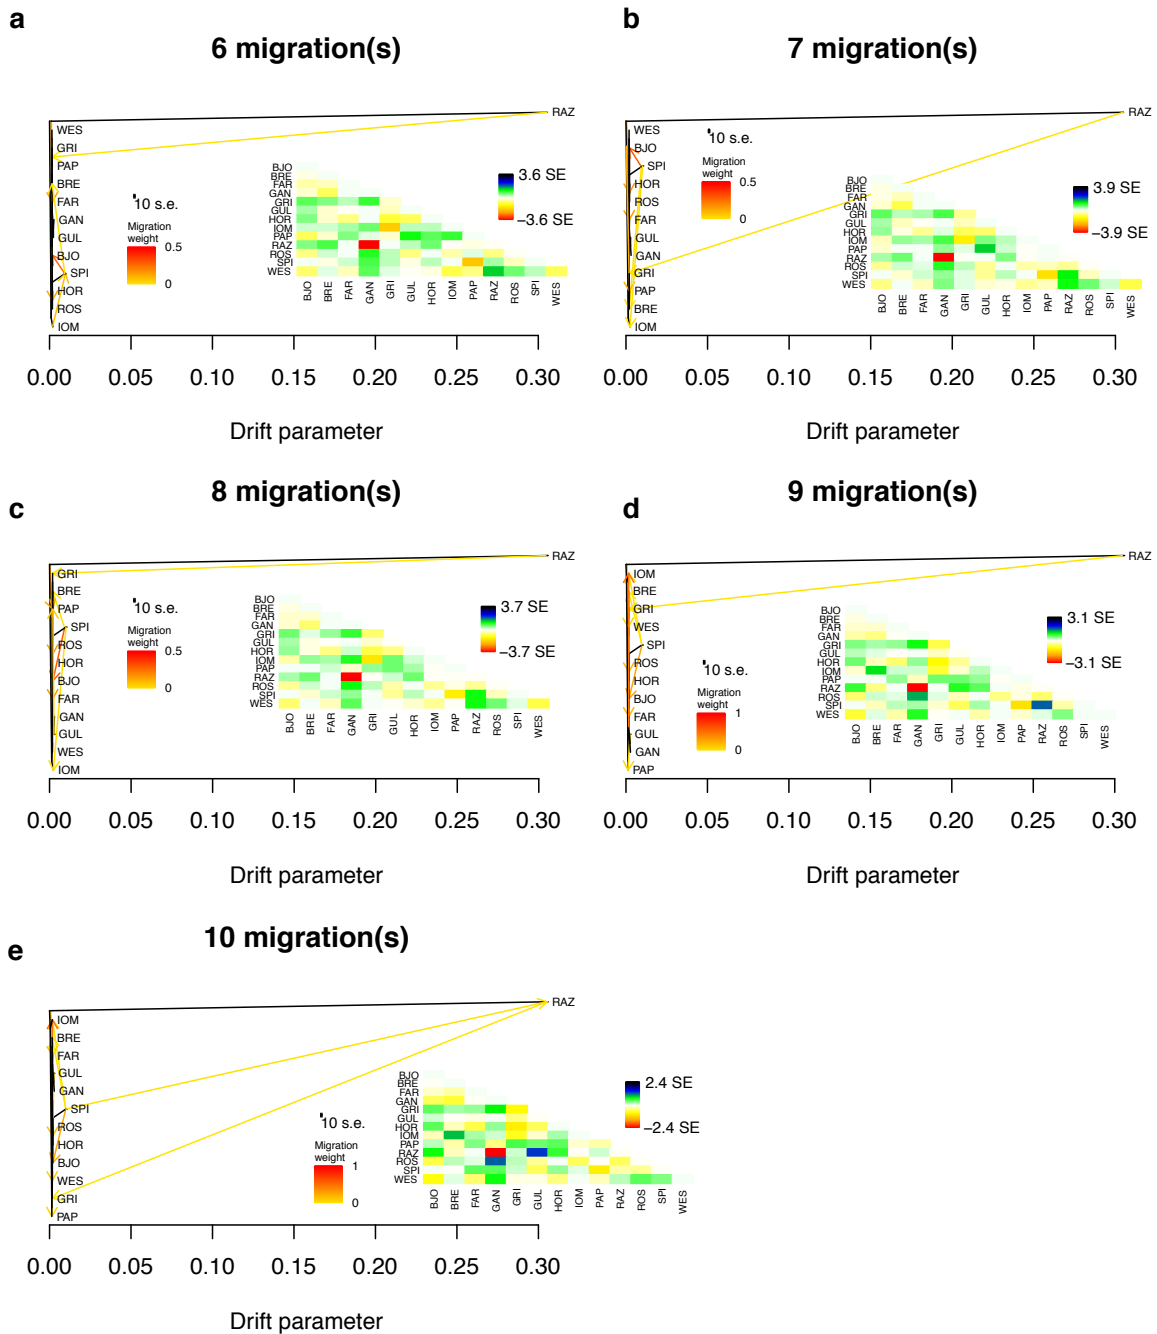

671  
672  
673  
674  
675  
676  
677  
678  
679  
680  
681

**Figure S11: Population-based Treemix analyses of 12 Atlantic puffin colonies applying between 6 and 10 migrations.** The phylogenies were constructed using allele frequencies at 1,093,765 polymorphic nuclear sites and adding 6-10 (a-e) migration edges. Migrations are shown as arrows and their weight are indicated by a color range. Branch lengths are equivalent to a genetic drift parameter. The heatmaps highlight the residual fit of the tree displaying the standard error of the covariance between populations. All trees are rooted using the razorbill as an outgroup.

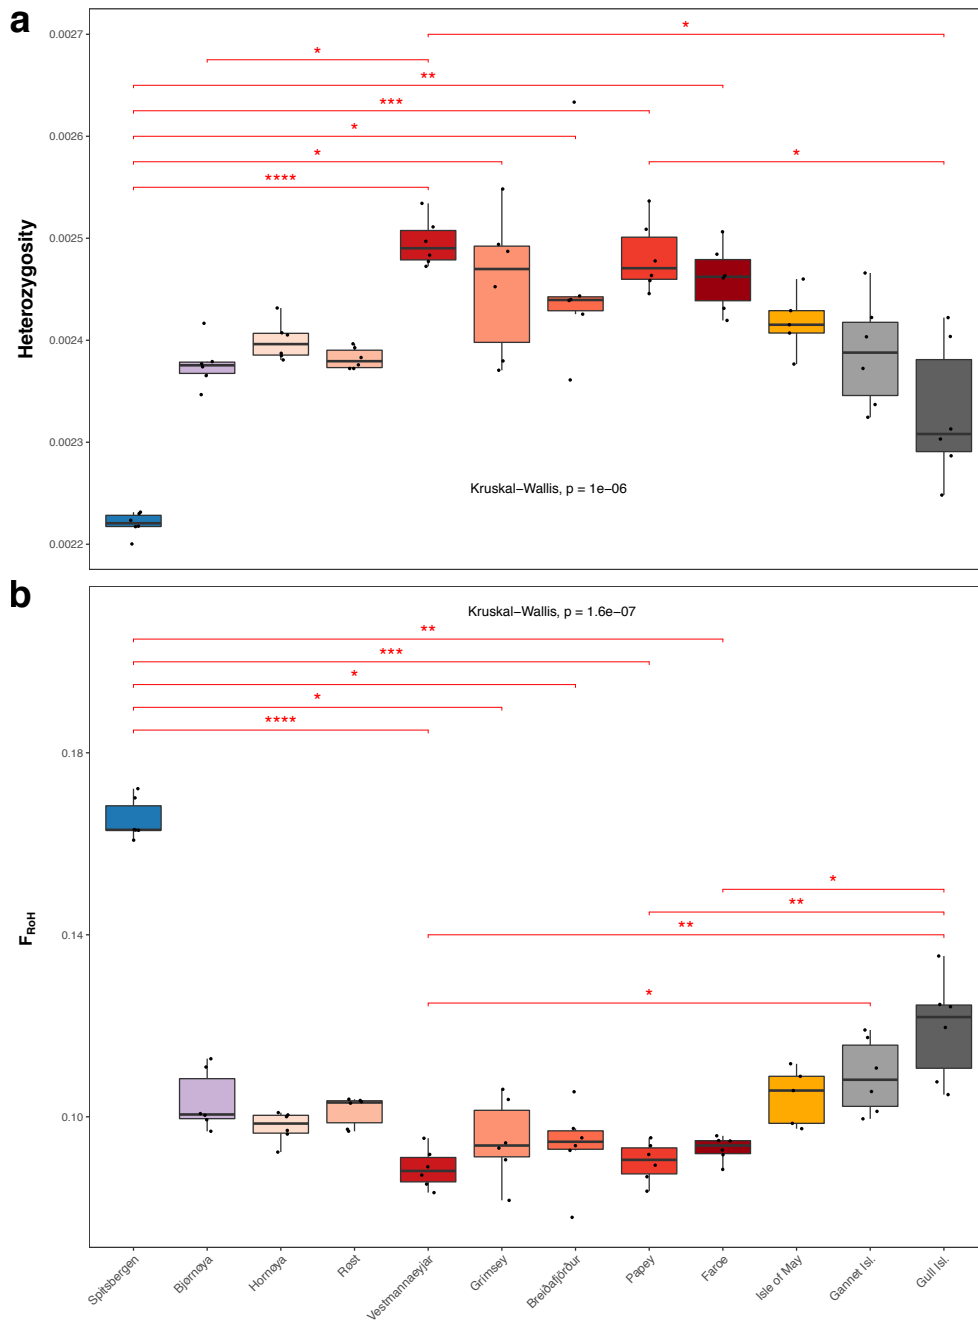

682  
 683  
 684  
 685  
 686  
 687  
 688  
 689  
 690  
 691  
 692  
 693  
 694  
 695  
 696

**Figure S12: Global genome-wide heterozygosity and inbreeding compared between 12 Atlantic puffin colonies across the species' breeding range.** a) Estimates of individual global genome-wide heterozygosity were based on the per-sample one-dimensional Site Frequency Spectrum calculated in ANGSD. b) Individual inbreeding coefficients,  $F_{RoH}$ , were defined as the fraction of the individual genomes filling into RoHs of a minimum length of 150 kbp. RoHs were declared as all regions with at least two subsequent 100 kbp windows harboring a heterozygosity below  $1.435663 \times 10^{-3}$ . In both plots, black dots indicate individual sample estimates and black lines the median per colony. Different colonies in both plots are indicated using different colors consistent with the remaining manuscript. Statistical significance of differences between populations was assessed with global Kruskal-Wallis tests, followed by *post-hoc* Dunn tests applying the Holm correction ( $n=12$ ). Significant differences are indicated in red. \* $p < 0.05$ , \*\* $p < 0.01$ , \*\*\* $p < 0.001$ , \*\*\*\* $p < 0.0001$ . Error bars show range of values within 1.5 times the interquartile range.

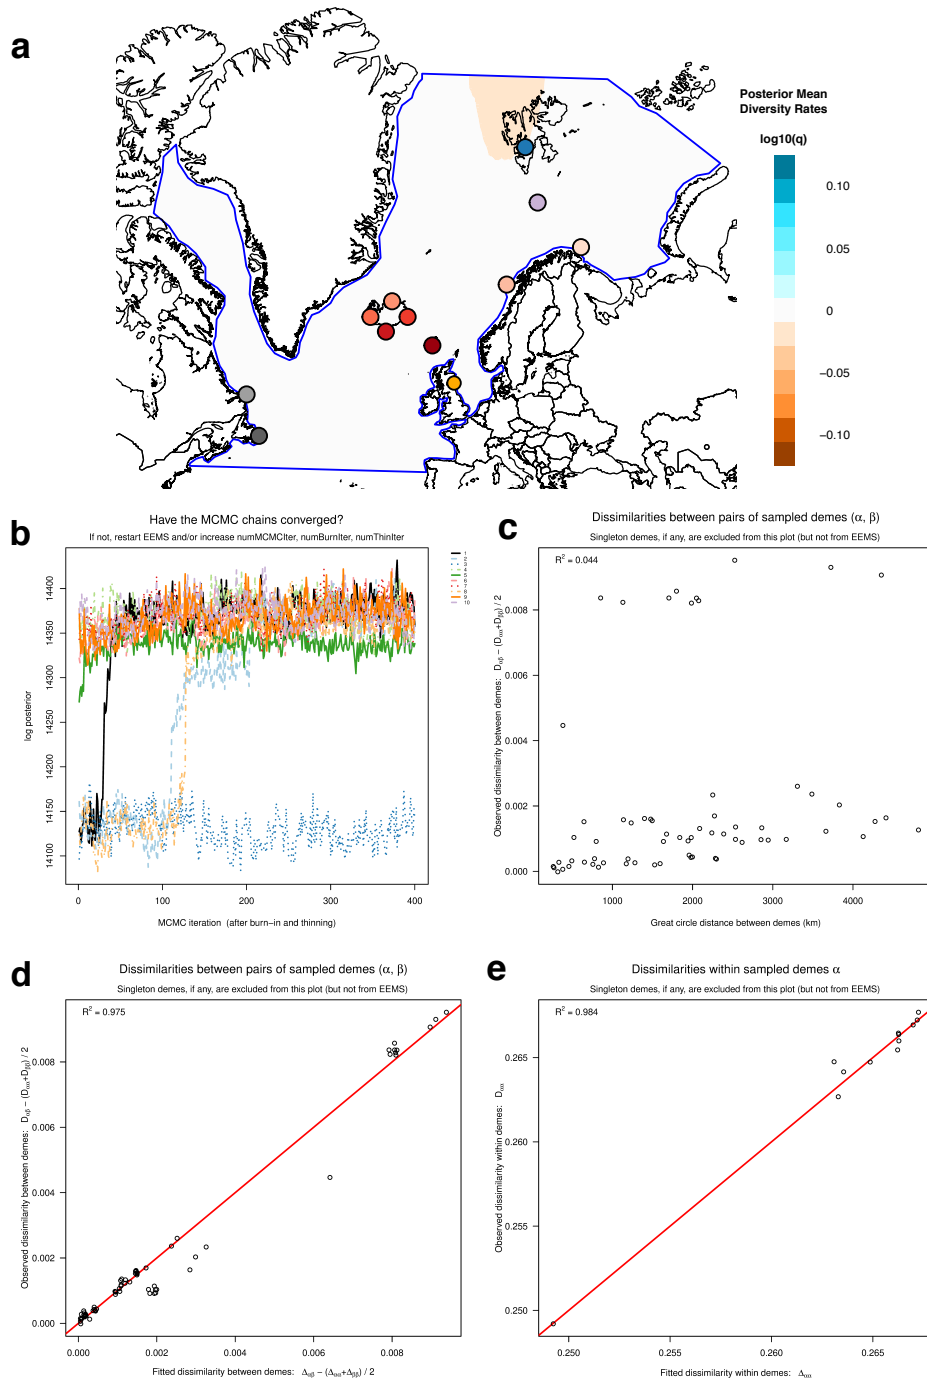

697

698

699 **Figure S13: Graphical output of EEMS analysis.** a) Posterior diversity rates plot depicts deviations  
700 from diversity estimates associated with continuous long-distance gene flow. Darker reds indicate  
701 reduced diversity across those areas, and darker blues indicate higher diversity rates than expected.

702 Different colonies are indicated using different colors consistent with the remaining manuscript.

703 Posterior probability trace plot of the ten MCMC chains providing an indication on the convergence.

704 Each chain was started from a different randomly initialized parameter state and one chain converged

705 at a local as opposed to the global maximum.

706 Genetic dissimilarities as calculated by the EEMS analysis vs. geographic distance between demes/colonies.

707 The two remaining plots show the observed vs. fitted genetic dissimilarities as calculated by the EEMS model

708 d) between and e) within demes/colonies. The red line indicates a fit of 100% between observed and model values.

709 The  $R^2$  value in c), d), and e) describes the fit of the correlation.

710

711



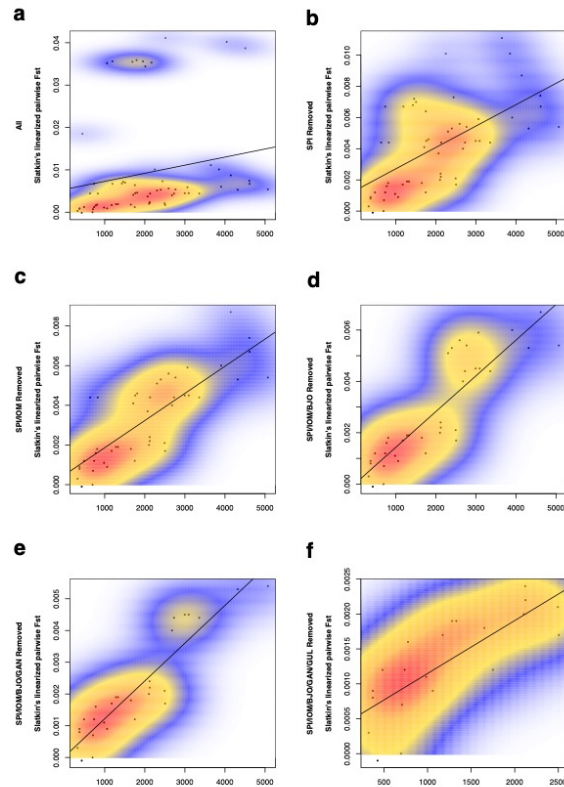

712  
713  
714  
715  
716  
717  
718  
719  
720  
721  
722  
723  
724  
725  
726  
727  
728  
729  
730  
731  
732  
733  
734  
735  
736  
737  
738  
739  
740  
741

**Figure S14: Isolation by distance (IBD) patterns for 12 Atlantic puffin populations.** Genetic (Slatkin's linearized  $F_{ST}$ ) distance as a function of geographic (Least Cost Path - only over water) distance (x-axes unit is kilometer) is presented for various colony subsets. The diagonal lines visualize the results of the Multiple Regression on Distance Matrices (MRM) analysis (slope and y-intercept). a) Using all colonies ( $n_{Colonies} = 12$ ), the Mantel test between genetic and geographic distance ( $R = 0.192$ ,  $P = 0.172$ ) was not significant and 3.69% of variance in Slatkin's linearized  $F_{ST}$  was explained by geographic distance (regression coefficient of linear IBD model =  $1.91 \times 10^{-6}$ ,  $P = 0.354$ ). b) After removing the Spitsbergen colony ( $n_{Colonies} = 11$ ), the Mantel test between genetic and geographic distance ( $R = 0.613$ ,  $P = 0.002$ ) was significant and 37.58% of variance in Slatkin's linearized  $F_{ST}$  was explained by geographic distance (regression coefficient of linear IBD model =  $1.37 \times 10^{-6}$ ,  $P = 0.003$ ). c) Without the Spitsbergen and Isle of May colony ( $n_{Colonies} = 10$ ), the Mantel test between genetic and geographic distance ( $R = 0.812$ ,  $P = 0.001$ ) was significant and 65.92% of variance in Slatkin's linearized  $F_{ST}$  was explained by geographic distance (regression coefficient of linear IBD model =  $1.37 \times 10^{-6}$ ,  $P = 0.002$ ). d) After removing the Spitsbergen, Isle of May and Bjørnøya colonies ( $n_{Colonies} = 9$ ), the Mantel test between genetic and geographic distance ( $R = 0.880$ ,  $P = 0.001$ ) was significant and 77.49% of variance in Slatkin's linearized  $F_{ST}$  was explained by geographic distance (regression coefficient of linear IBD model =  $1.39 \times 10^{-6}$ ,  $P = 0.002$ ). e) Without the Spitsbergen, Isle of May, Bjørnøya and Gannet Island colonies ( $n_{Colonies} = 8$ ), the Mantel test between genetic and geographic distance ( $R = 0.922$ ,  $P = 0.002$ ) was significant and 84.98% of variance in Slatkin's linearized  $F_{ST}$  was explained by geographic distance (regression coefficient of linear IBD model =  $1.19 \times 10^{-6}$ ,  $P = 0.001$ ). f) After removing the Spitsbergen, Isle of May, Bjørnøya and Canadian colonies ( $n_{Colonies} = 7$ ), the Mantel test between genetic and geographic distance ( $R = 0.775$ ,  $P = 0.012$ ) was significant and 60.08% of variance in Slatkin's linearized  $F_{ST}$  was explained by geographic distance (regression coefficient of linear IBD model =  $0.76 \times 10^{-6}$ ,  $P = 0.006$ ). A two-dimensional kernel density estimation (kde2d) highlights dense groups of data points in all subplots, thus substructure in the genomic landscape pattern. Analyses were conducted and results visualized in R using the *ecodist*, *marmap* and *MASS* packages.

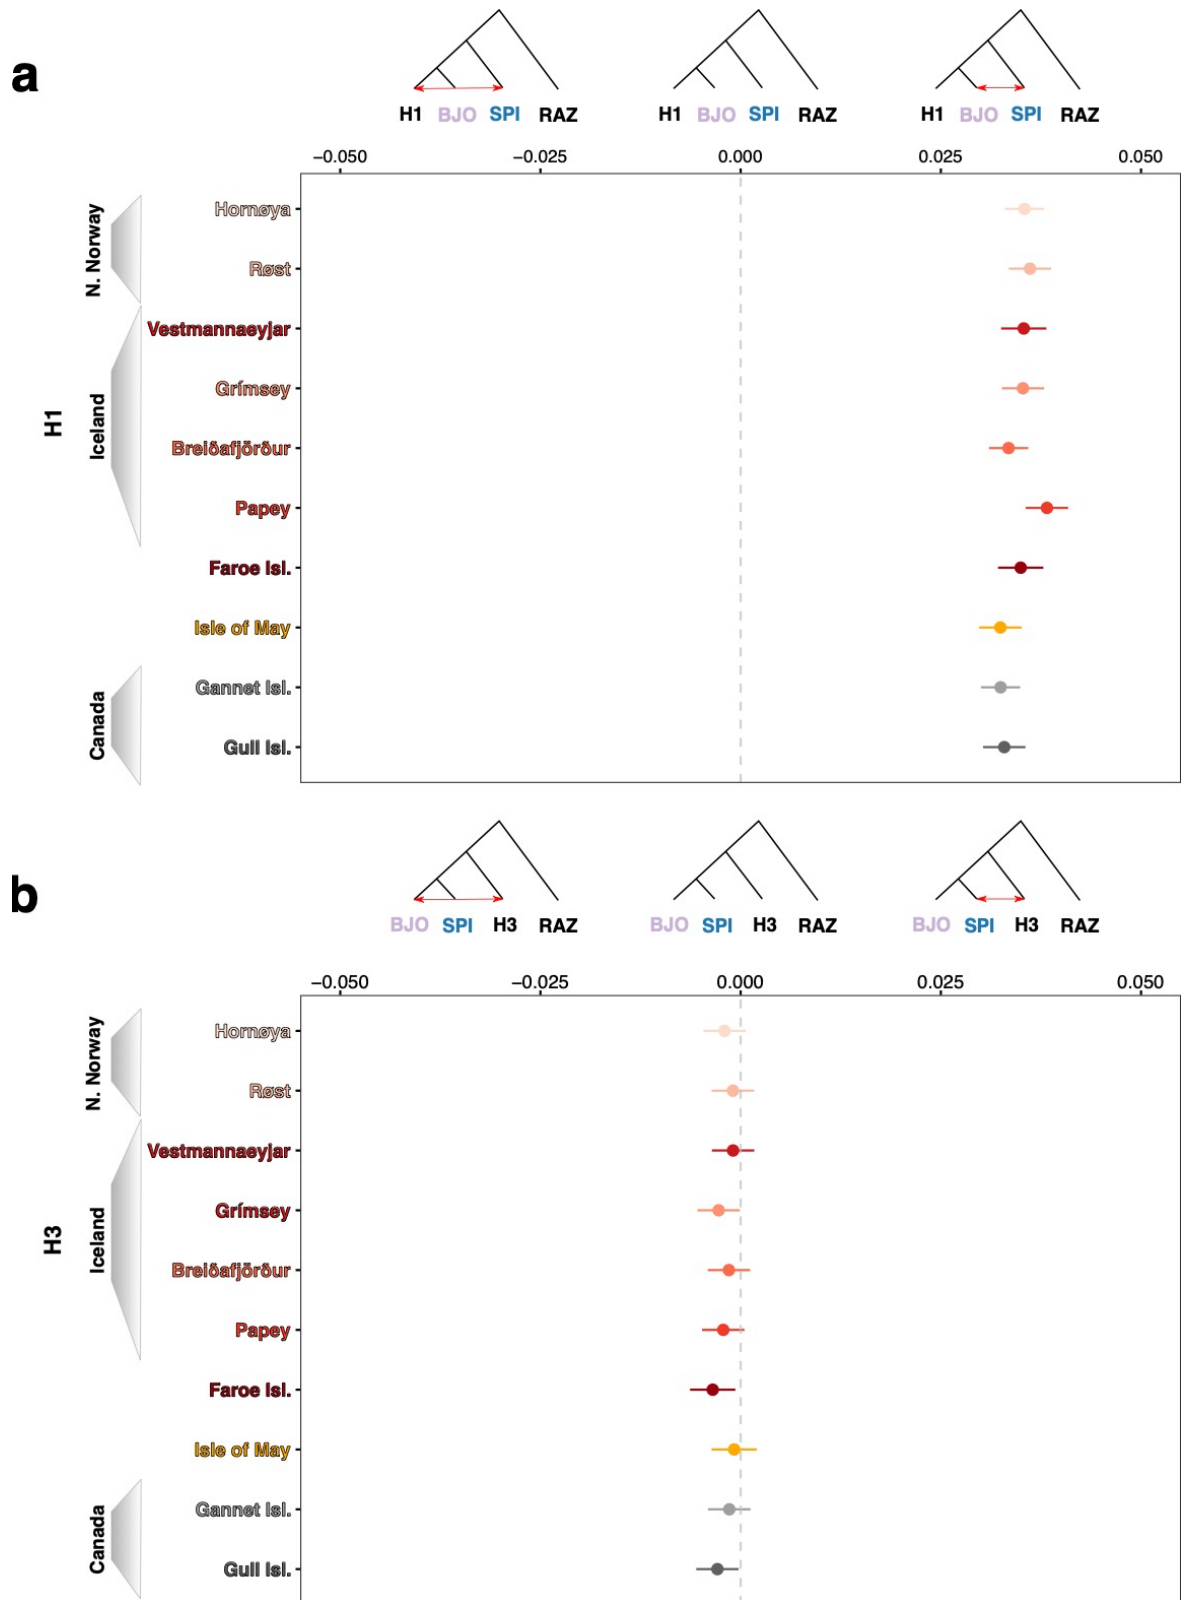

742  
743  
744  
745  
746  
747  
748  
749

**Figure S15: D-statistics for two topologies involving the Spitsbergen and Bjørnøya colonies.** The D-statistic (ABBA test) was calculated for the tree configuration a) (((H1, BJO),SPI),RAZ) and b) (((BJO, SPI),H3),RAZ) using the razorbill as the outgroup. The error bars indicate one standard deviation of the D-statistic. The grey dashed line presents the null expectation of no excess gene flow between a) Bjørnøya/H1 and Spitsbergen and b) Bjørnøya/Spitsbergen and H3.

750

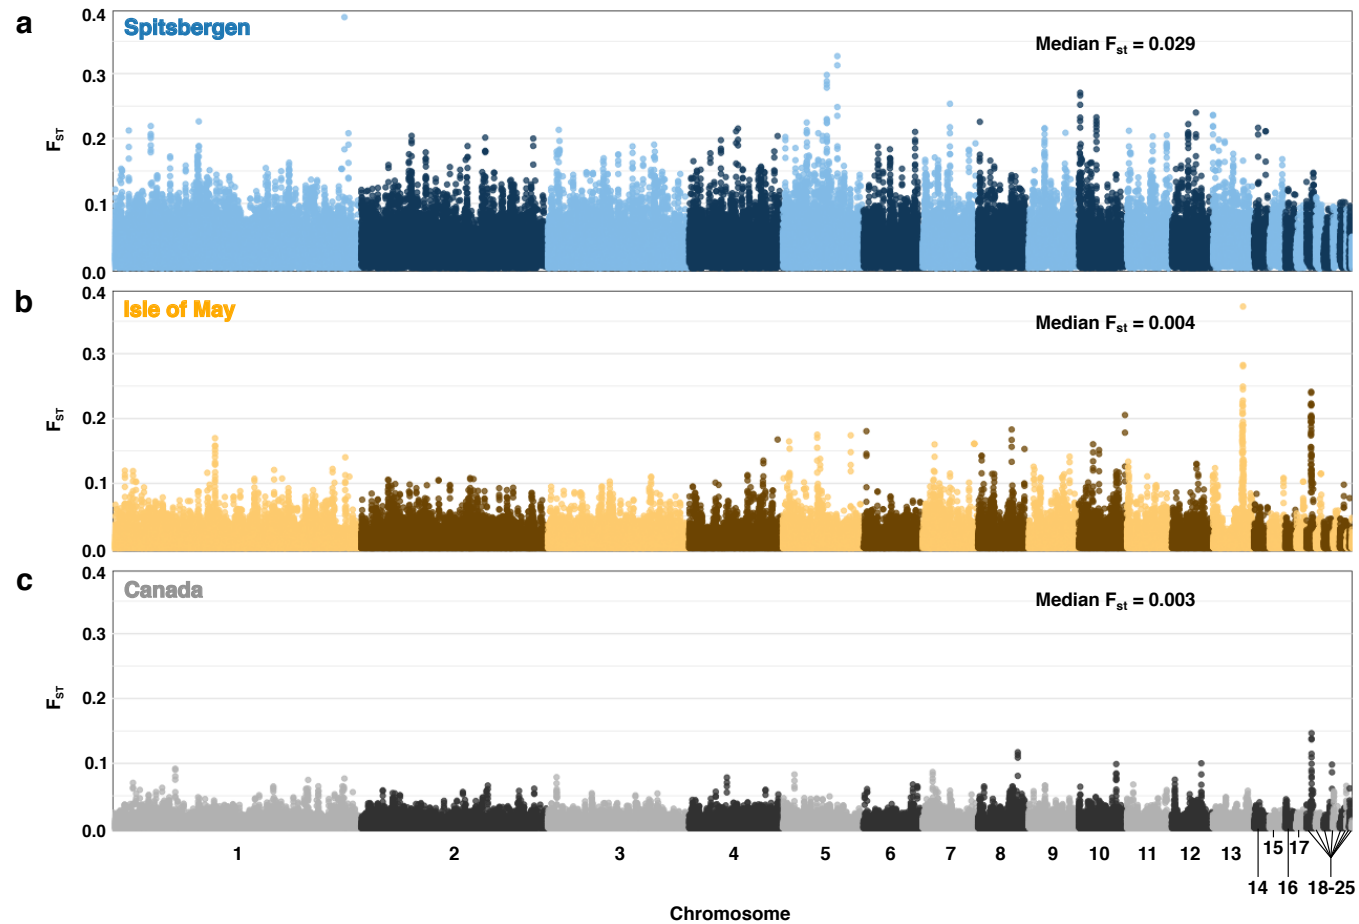

751

752

753

754

755

756

**Figure S16: Genome-wide analysis of pairwise  $F_{ST}$  between four genomic population clusters of the Atlantic puffin.** Estimates of pairwise  $F_{ST}$  were calculated between the Norway/Iceland/Faroe cluster and the a) Spitsbergen, b) Isle of May, and c) Canada clusters in 50 kb sliding windows with a 12.5 kb shift along the 25 pseudo-chromosomes. Estimates are based on two-dimensional Site Frequency Spectra calculated in ANGSD. The different chromosomes are represented by different shades following the cluster color used throughout the main manuscript.

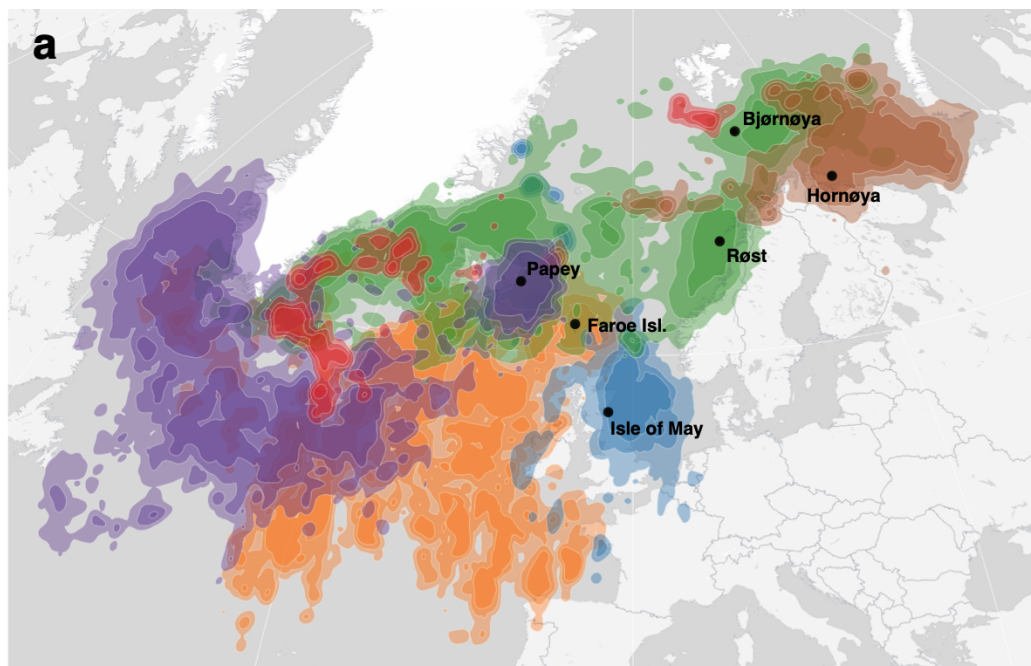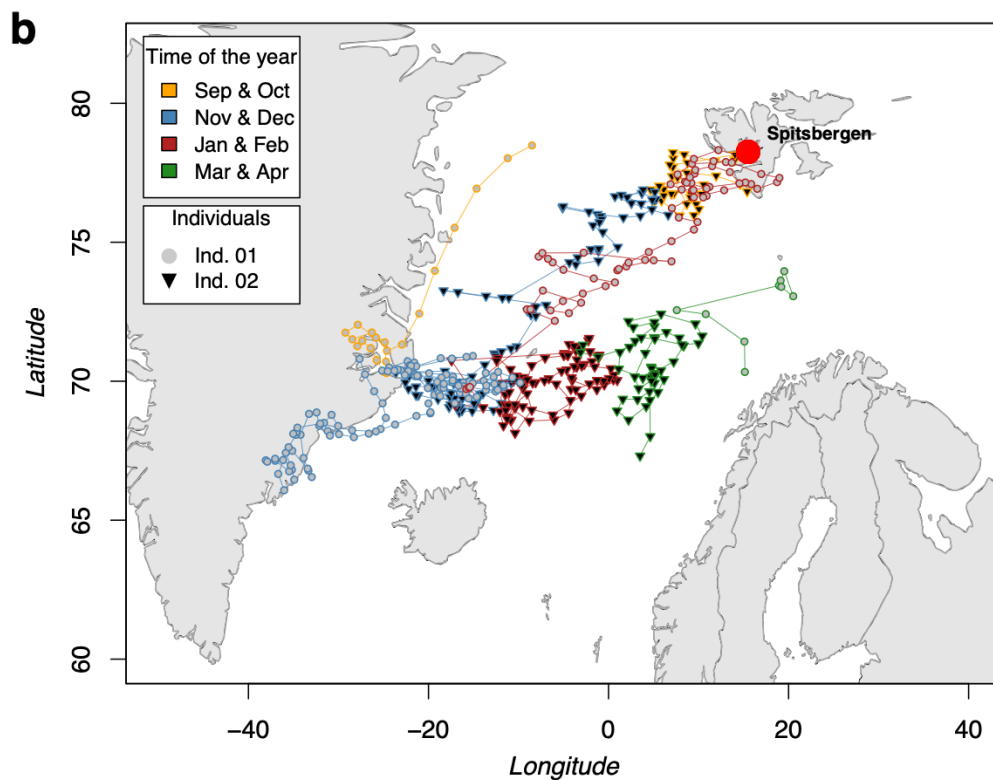

758  
 759  
 760  
 761  
 762  
 763  
 764  
 765  
 766

**Figure S17: Overwintering distribution of several Atlantic puffin colonies spread across the species' breeding range.** The data for the non-breeding distribution of the six colonies highlighted in a) and sampled in this study was made available by SEATRACK (<http://www.seapop.no/en/seatrack/>) and collected between 2009-2019 in the months of August-April using GLS loggers. Bjørnøya = red, Hornøya = brown, Røst = green, Papey = purple, Faroe Isl. = orange, and Isle of May = blue. b) Distributional data of two Spitsbergen individuals collected in 2018-2019 using GLS loggers.

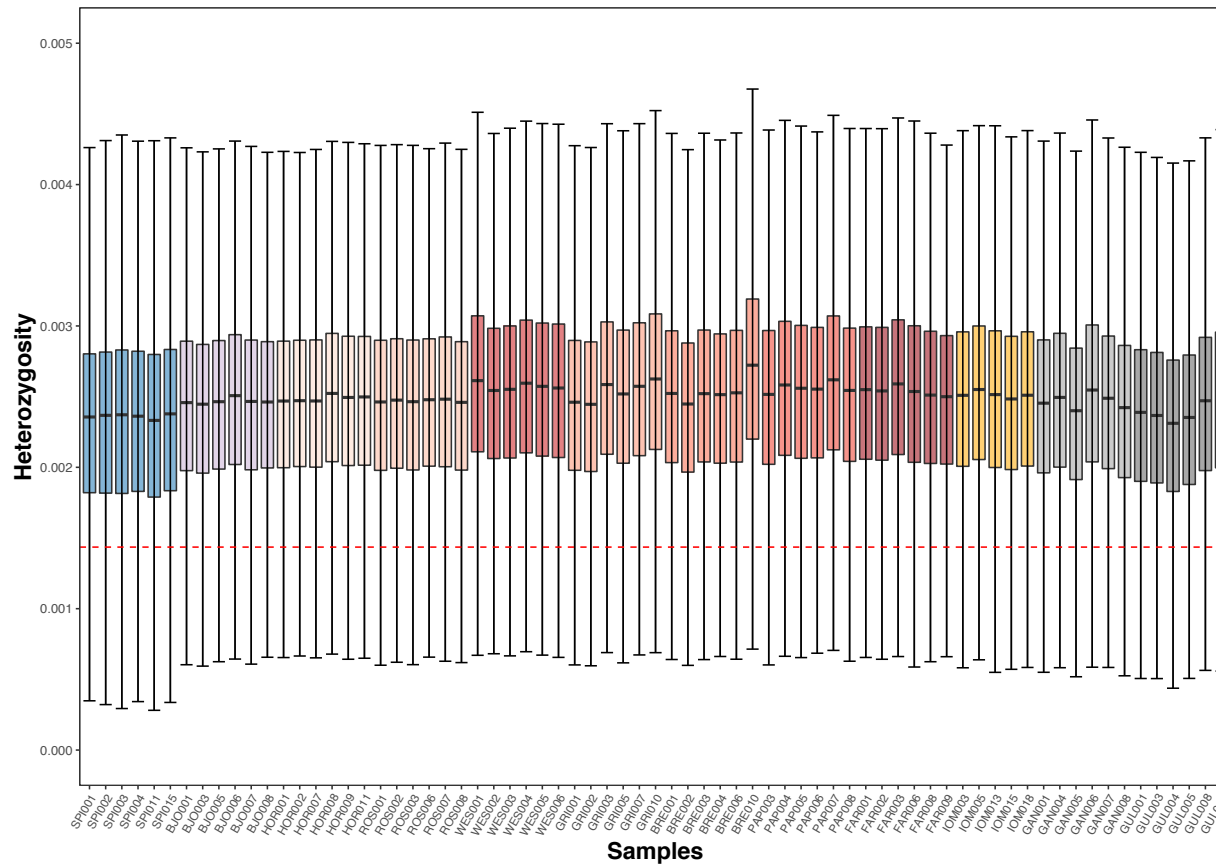

768  
 769  
 770  
 771  
 772  
 773  
 774  
 775  
 776

**Figure S18: Local genome-wide heterozygosity compared between 71 Atlantic puffin individuals across 12 colonies throughout the species' breeding range.** Estimates of individual genome-wide heterozygosity are based on local estimates of heterozygosity in 100 kbp sliding windows with a 50 kbp shift along the 25 pseudo-chromosomes. Local estimates per window are based on one-dimensional Site Frequency Spectra calculated in ANGSD. The dashed red line indicates the 10% quantile of the average local heterozygosity across all samples ( $1.435663 \times 10^{-3}$ ). Black lines present the median per sample. Error bars show range of values within 1.5 times the interquartile range. Different colonies are indicated using different colors consistent with the remaining manuscript.

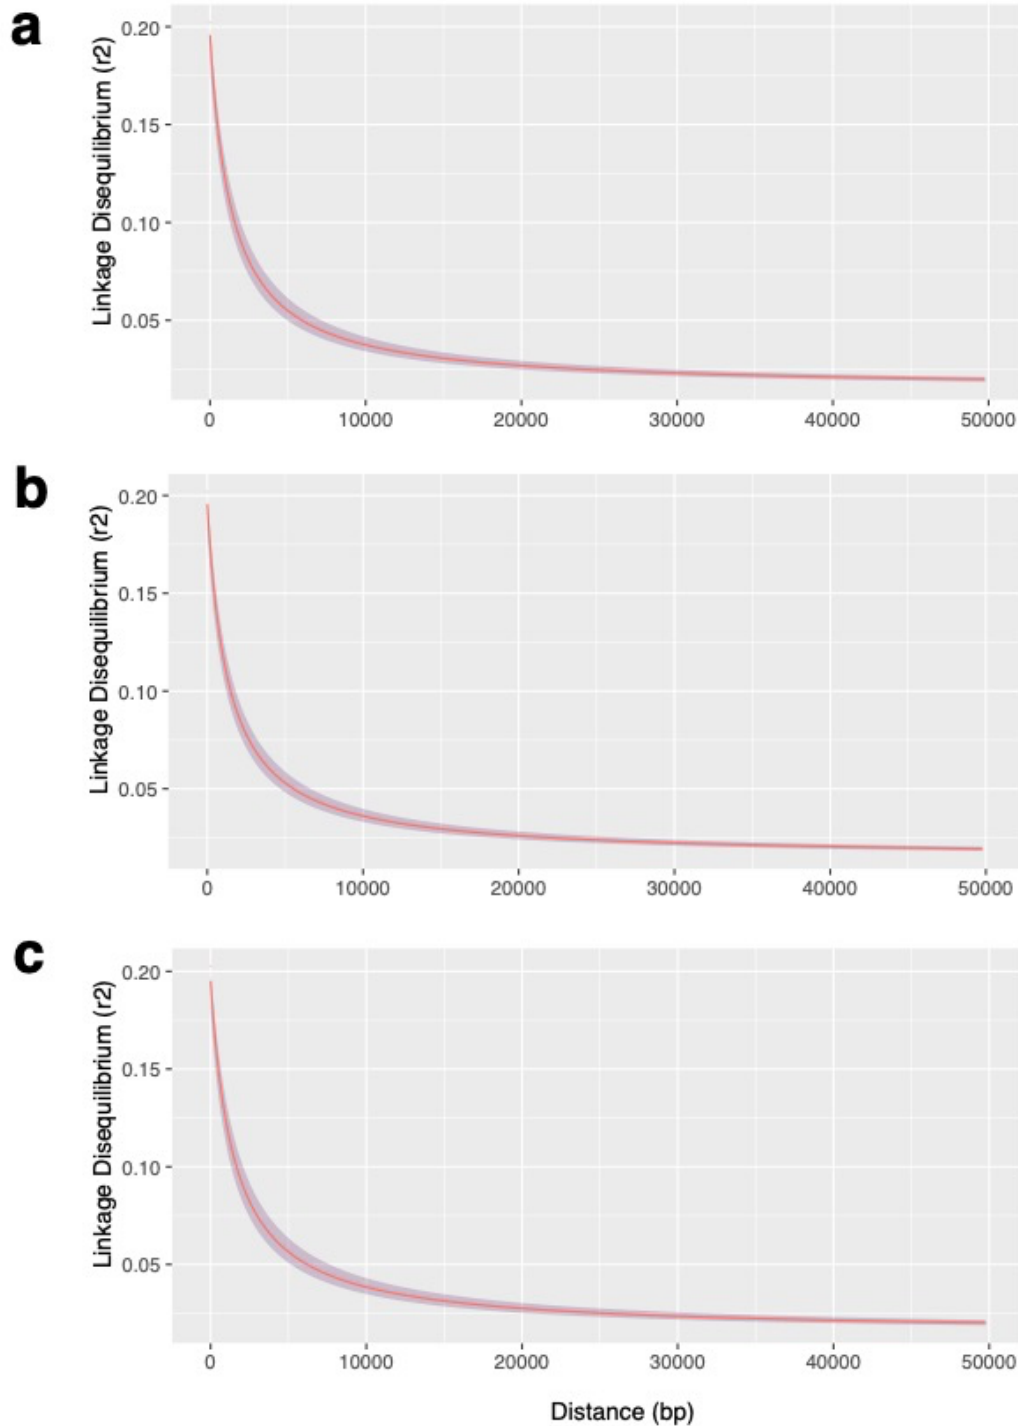

778

779

780 **Figure S19: Linkage Disequilibrium (LD) decay across the three longest pseudo-chromosomes of**781 **the Atlantic puffin draft reference genome.** Linkage expressed as the  $r^2$  value was calculated for pairs

782 of sites within 50 kb windows along pseudo-chromosomes a) 1, b) 2, and c) 3 using ngsLD. The shaded

783 grey area indicates 95% confidence intervals. To visualize the results, the R script *fit\_LDdecay.R*784 (supplied with ngsLD) was run with `--max_kb_dist 100 --fit_boot 100 --fit_level 20 --plot_data --plot_scale`

3

## 785 5. References

- 786 1. Weisenfeld, N. I., Kumar, V., Shah, P., Church, D. M. & Jaffe, D. B. Direct determination of  
787 diploid genome sequences. *Genome Res.* **27**, 757–767 (2017).
- 788 2. Taylor, G. A. *et al.* The genome of the North American brown bear or grizzly: *Ursus arctos*  
789 *ssp. horribilis*. *Genes* **9**, (2018).
- 790 3. Kwan, H. H. *et al.* The genome of the Steller sea lion (*Eumetopias jubatus*). *Genes* **10**, (2019).
- 791 4. Jones, S. J. *et al.* The genome of the northern sea otter (*Enhydra lutris kenyoni*). *Genes* **8**,  
792 (2017).
- 793 5. Jones, S. J. M. *et al.* The genome of the beluga whale (*Delphinapterus leucas*). *Genes* **8**,  
794 (2017).
- 795 6. Roach, M. J., Schmidt, S. A. & Borneman, A. R. Purge Haplotigs: allelic contig reassignment  
796 for third-gen diploid genome assemblies. *BMC Bioinformatics* **19**, 460 (2018).
- 797 7. Jackman, S. D. *et al.* Tigmint: correcting assembly errors using linked reads from large  
798 molecules. *BMC Bioinformatics* **19**, 393 (2018).
- 799 8. Coombe, L. *et al.* ARKS: chromosome-scale scaffolding of human genome drafts with linked  
800 read kmers. *BMC Bioinformatics* **19**, 234 (2018).
- 801 9. Warren, R. L. *et al.* LINKS: Scalable, alignment-free scaffolding of draft genomes with long  
802 reads. *Gigascience* **4**, 35 (2015).
- 803 10. Simão, F. A., Waterhouse, R. M., Ioannidis, P., Kriventseva, E. V. & Zdobnov, E. M. BUSCO:  
804 assessing genome assembly and annotation completeness with single-copy orthologs.  
805 *Bioinformatics* **31**, 3210–3212 (2015).
- 806 11. Gurevich, A., Saveliev, V., Vyahhi, N. & Tesler, G. QUAST: quality assessment tool for  
807 genome assemblies. *Bioinformatics* **29**, 1072–1075 (2013).
- 808 12. Paulino, D. *et al.* Sealer: a scalable gap-closing application for finishing draft genomes. *BMC*  
809 *Bioinformatics* **16**, 230 (2015).
- 810 13. Warren, R. L. *et al.* ntEdit: scalable genome sequence polishing. *Bioinformatics* (2019)  
811 doi:10.1093/bioinformatics/btz400.
- 812 14. Wood, D. E. & Salzberg, S. L. Kraken: ultrafast metagenomic sequence classification using  
813 exact alignments. *Genome Biol.* **15**, R46 (2014).
- 814 15. Laetsch, D. R. & Blaxter, M. L. BlobTools: Interrogation of genome assemblies. *F1000Res.*  
815 **6**, (2017).

- 816 16. Waterhouse, A. M., Procter, J. B., Martin, D. M. A., Clamp, M. & Barton, G. J. Jalview Version  
817 2—a multiple sequence alignment editor and analysis workbench. *Bioinformatics* **25**, 1189–  
818 1191 (2009).
- 819 17. Shen, W., Le, S., Li, Y. & Hu, F. SeqKit: A cross-platform and ultrafast toolkit for FASTA/Q  
820 file manipulation. *PLoS One* **11**, e0163962 (2016).
- 821 18. Bernt, M. *et al.* MITOS: improved de novo metazoan mitochondrial genome annotation. *Mol.*  
822 *Phylogenet. Evol.* **69**, 313–319 (2013).
- 823 19. Al Arab, M. *et al.* Accurate annotation of protein-coding genes in mitochondrial genomes.  
824 *Mol. Phylogenet. Evol.* **106**, 209–216 (2017).
- 825 20. Lowe, T. M. & Chan, P. P. tRNAscan-SE On-line: integrating search and context for analysis  
826 of transfer RNA genes. *Nucleic Acids Res.* **44**, W54–7 (2016).
- 827 21. Yu, Y., Ouyang, Y. & Yao, W. shinyCircos: an R/Shiny application for interactive creation of  
828 Circos plot. *Bioinformatics* **34**, 1229–1231 (2018).
- 829 22. Li, H. Minimap2: pairwise alignment for nucleotide sequences. *Bioinformatics* **34**, 3094–3100  
830 (2018).
- 831 23. Campos, P. F. & Gilbert, T. M. P. DNA extraction from keratin and chitin. in *Ancient DNA:*  
832 *Methods and Protocols* (eds. Shapiro, B. & Hofreiter, M.) 43–49 (Humana Press, 2012).
- 833 24. Griffiths, R., Double, M. C., Orr, K. & Dawson, R. J. A DNA test to sex most birds. *Mol. Ecol.*  
834 **7**, 1071–1075 (1998).
- 835 25. Bantock, T. M., Prys-Jones, R. P. & Lee, P. L. M. New and improved molecular sexing  
836 methods for museum bird specimens. *Mol. Ecol. Resour.* **8**, 519–528 (2008).
- 837 26. Schubert, M. *et al.* Characterization of ancient and modern genomes by SNP detection and  
838 phylogenomic and metagenomic analysis using PALEOMIX. *Nat. Protoc.* **9**, 1056–1082  
839 (2014).
- 840 27. Lindgreen, S. AdapterRemoval: easy cleaning of next-generation sequencing reads. *BMC*  
841 *Res. Notes* **5**, 337 (2012).
- 842 28. Li, H. Aligning sequence reads, clone sequences and assembly contigs with BWA-MEM.  
843 *arXiv preprint arXiv:1303.3997* (2013).
- 844 29. Broad Institute. Picard Toolkit. <http://broadinstitute.github.io/picard/>.
- 845 30. McKenna, A. *et al.* The Genome Analysis Toolkit: a MapReduce framework for analyzing  
846 next-generation DNA sequencing data. *Genome Res.* **20**, 1297–1303 (2010).
- 847 31. Li, H. *et al.* The sequence alignment/map format and SAMtools. *Bioinformatics* **25**, 2078–  
848 2079 (2009).



- 849 32. Van der Auwera, G. A. *et al.* From FastQ data to high confidence variant calls: the Genome  
850 Analysis Toolkit best practices pipeline. *Curr. Protoc. Bioinformatics* **43**, 11.10.1–33 (2013).
- 851 33. Cingolani, P. *et al.* A program for annotating and predicting the effects of single nucleotide  
852 polymorphisms, SnpEff: SNPs in the genome of *Drosophila melanogaster* strain w1118; iso-  
853 2; iso-3. *Fly* **6**, 80–92 (2012).
- 854 34. Edgar, R. C. MUSCLE: multiple sequence alignment with high accuracy and high throughput.  
855 *Nucleic Acids Res.* **32**, 1792–1797 (2004).
- 856 35. Kalyaanamoorthy, S., Minh, B. Q., Wong, T. K. F., von Haeseler, A. & Jermini, L. S.  
857 ModelFinder: fast model selection for accurate phylogenetic estimates. *Nat. Methods* **14**,  
858 587–589 (2017).
- 859 36. Lanfear, R., Calcott, B., Ho, S. Y. W. & Guindon, S. Partitionfinder: combined selection of  
860 partitioning schemes and substitution models for phylogenetic analyses. *Mol. Biol. Evol.* **29**,  
861 1695–1701 (2012).
- 862 37. Chernomor, O., von Haeseler, A. & Minh, B. Q. Terrace aware data structure for  
863 phylogenomic inference from supermatrices. *Syst. Biol.* **65**, 997–1008 (2016).
- 864 38. Gadagkar, S. R., Rosenberg, M. S. & Kumar, S. Inferring species phylogenies from multiple  
865 genes: concatenated sequence tree versus consensus gene tree. *J. Exp. Zool. B Mol. Dev.*  
866 *Evol.* **304**, 64–74 (2005).
- 867 39. Matschiner, M. Fitchi: haplotype genealogy graphs based on the Fitch algorithm.  
868 *Bioinformatics* **32**, 1250–1252 (2016).
- 869 40. Excoffier, L. & Lischer, H. E. L. Arlequin suite ver 3.5: a new series of programs to perform  
870 population genetics analyses under Linux and Windows. *Mol. Ecol. Resour.* **10**, 564–567  
871 (2010).
- 872 41. Tajima, F. Statistical method for testing the neutral mutation hypothesis by DNA  
873 polymorphism. *Genetics* **123**, 585–595 (1989).
- 874 42. Watterson, G. A. Heterosis or neutrality? *Genetics* **85**, 789–814 (1977).
- 875 43. Chakraborty, R. Mitochondrial DNA polymorphism reveals hidden heterogeneity within some  
876 Asian populations. *Am. J. Hum. Genet.* **47**, 87–94 (1990).
- 877 44. Fu, Y. X. Statistical tests of neutrality of mutations against population growth, hitchhiking and  
878 background selection. *Genetics* **147**, 915–925 (1997).
- 879 45. Korneliussen, T. S., Albrechtsen, A. & Nielsen, R. ANGSD: Analysis of next generation  
880 sequencing data. *BMC Bioinformatics* **15**, 356 (2014).
- 881 46. R Core Team. R: A language and environment for statistical computing. (2020).

- 882 47. Fox, E. A., Wright, A. E., Fumagalli, M. & Vieira, F. G. ngsLD: evaluating linkage  
883 disequilibrium using genotype likelihoods. *Bioinformatics* **35**, 3855–3856 (2019).
- 884 48. Van Dongen, S. Graph clustering via a discrete uncoupling process. *SIAM J. Matrix Anal.*  
885 *Appl.* **30**, 121–141 (2008).
- 886 49. Li, L., Stoeckert, C. J., Jr & Roos, D. S. OrthoMCL: identification of ortholog groups for  
887 eukaryotic genomes. *Genome Res.* **13**, 2178–2189 (2003).
- 888 50. Orlando, L. & Librado, P. Origin and evolution of deleterious mutations in horses. *Genes* **10**,  
889 (2019).
- 890 51. Meisner, J. & Albrechtsen, A. Inferring population structure and admixture proportions in low-  
891 depth NGS data. *Genetics* **210**, 719–731 (2018).
- 892 52. Skotte, L., Korneliussen, T. S. & Albrechtsen, A. Estimating individual admixture proportions  
893 from next generation sequencing data. *Genetics* **195**, 693–702 (2013).
- 894 53. Kopelman, N. M., Mayzel, J., Jakobsson, M., Rosenberg, N. A. & Mayrose, I. Clumpak: a  
895 program for identifying clustering modes and packaging population structure inferences  
896 across K. *Mol. Ecol. Resour.* **15**, 1179–1191 (2015).
- 897 54. Evanno, G., Regnaut, S. & Goudet, J. Detecting the number of clusters of individuals using  
898 the software STRUCTURE: a simulation study. *Mol. Ecol.* **14**, 2611–2620 (2005).
- 899 55. Lefort, V., Desper, R. & Gascuel, O. FastME 2.0: A comprehensive, accurate, and fast  
900 distance-based phylogeny inference program. *Mol. Biol. Evol.* **32**, 2798–2800 (2015).
- 901 56. Nguyen, L.-T., Schmidt, H. A., von Haeseler, A. & Minh, B. Q. IQ-TREE: a fast and effective  
902 stochastic algorithm for estimating maximum-likelihood phylogenies. *Mol. Biol. Evol.* **32**, 268–  
903 274 (2015).
- 904 57. Pickrell, J. K. & Pritchard, J. K. Inference of population splits and mixtures from genome-wide  
905 allele frequency data. *PLoS Genet.* **8**, e1002967 (2012).
- 906 58. Matz, M. V. Fantastic Beasts and How To Sequence Them: Ecological Genomics for Obscure  
907 Model Organisms. *Trends Genet.* **34**, 121–132 (2018).
- 908 59. Mann, H. B. & Whitney, D. R. On a test of whether one of two random variables is  
909 stochastically larger than the other. *Ann. Math. Stat.* **18**, 50–60 (1947).
- 910 60. Holm, S. A simple sequentially rejective multiple test procedure. *Scand. Stat. Theory Appl.* **6**,  
911 65–70 (1979).
- 912 61. Kruskal, W. H. & Wallis, W. A. Use of ranks in one-criterion variance analysis. *J. Am. Stat.*  
913 *Assoc.* **47**, 583–621 (1952).
- 914 62. Dunn, O. J. Multiple comparisons using rank sums. *Technometrics* **6**, 241–252 (1964).

- 915 63. Sánchez-Barreiro, F. *et al.* Historical population declines prompted significant genomic  
916 erosion in the northern and southern white rhinoceros (*Ceratotherium simum*). *bioRxiv*  
917 2020.05.10.086686 (2020) doi:10.1101/2020.05.10.086686.
- 918 64. Petkova, D., Novembre, J. & Stephens, M. Visualizing spatial population structure with  
919 estimated effective migration surfaces. *Nat. Genet.* **48**, 94–100 (2016).
- 920 65. Mantel, N. The detection of disease clustering and a generalized regression approach.  
921 *Cancer Res.* **27**, 209–220 (1967).
- 922 66. Lichstein, J. W. Multiple regression on distance matrices: a multivariate spatial analysis tool.  
923 *Plant Ecol.* **188**, 117–131 (2007).
- 924 67. Slatkin, M. A measure of population subdivision based on microsatellite allele frequencies.  
925 *Genetics* **139**, 457–462 (1995).
- 926 68. Pante, E., Simon-Bouhet, B. & Irisson, J.-O. *marmap - R package*. (2019).
- 927 69. Goslee, S. & Urban, D. The ecodist package for dissimilarity-based analysis of ecological  
928 data. *Journal of Statistical Software, Articles* **22**, 1–19 (2007).
- 929 70. Venables, W. N. & Ripley, B. D. *Modern Applied Statistics with S*. (Springer, 2002).
- 930 71. Legendre, P. & Anderson, M. J. Distance-based redundancy analysis: Testing multispecies  
931 responses in multifactorial ecological experiments. *Ecol. Monogr.* **69**, 1–24 (1999).
- 932 72. Cailliez, F. The analytical solution of the additive constant problem. *Psychometrika* **48**, 305–  
933 308 (1983).
- 934 73. Dray, S., Legendre, P. & Peres-Neto, P. R. Spatial modelling: a comprehensive framework  
935 for principal coordinate analysis of neighbour matrices (PCNM). *Ecol. Modell.* **196**, 483–493  
936 (2006).
- 937 74. Borcard, D. & Legendre, P. All-scale spatial analysis of ecological data by means of principal  
938 coordinates of neighbour matrices. *Ecol. Modell.* **153**, 51–68 (2002).
- 939 75. Dray, S. *et al.* *adespatial: Multivariate Multiscale Spatial Analysis*. *R package version 0.3-13*.  
940 <https://CRAN.R-project.org/package=adespatial>. (2021).
- 941 76. Anker-Nilssen, T., Aarvak, T. & Bangjord, G. Mass mortality of Atlantic Puffins *Fratercula*  
942 *arctica* off Central Norway, spring 2002: causes and consequences. *Atl. Seabirds* **5**, 57–72  
943 (2003).
- 944 77. Rayner, N. A. Global analyses of sea surface temperature, sea ice, and night marine air  
945 temperature since the late nineteenth century. *J. Geophys. Res.* **108**, (2003).
- 946 78. Blanchet, F. G., Legendre, P. & Borcard, D. Modelling directional spatial processes in  
947 ecological data. *Ecol. Modell.* **215**, 325–336 (2008).

- 948 79. Benestan, L. M. *et al.* Population genomics and history of speciation reveal fishery  
949 management gaps in two related redfish species (*Sebastes mentella* and *Sebastes*  
950 *fasciatus*). *Evol. Appl.* **14**, 588–606 (2021).
- 951 80. Soraggi, S., Wiuf, C. & Albrechtsen, A. Powerful inference with the D-statistic on low-coverage  
952 whole-genome data. *G3* **8**, 551–566 (2018).
- 953
